# Supplementary material for: Synthesis of 10B-enriched 2,1-borazaronaphthalenes from o-aminostyrenes and 10BF3
Source: Royal Society of Chemistry journal article supplement (doi:10.1039/d4qo00176a), 2024-01-01
Supplement: d4qo00176a1.pdf [file d4qo00176a1.pdf]

# Synthesis of $^{10}\text{B}$ -enriched 2,1-Borazaronaphthalenes from *o*-Aminostyrenes and $^{10}\text{BF}_3$

Weihua Qiu<sup>1</sup>, Jide Zhu<sup>1</sup>, Rencai Tao<sup>1</sup>, Kai Yang\*<sup>1</sup> and Qiuling Song\*<sup>1,2</sup>

<sup>1</sup>*Key Laboratory of Molecule Synthesis and Function Discovery, Fujian Province University, College of Chemistry at Fuzhou University, Fuzhou, Fujian, 350108, China*

<sup>2</sup>*School of Chemistry and Chemical Engineering, Henan Normal University, Xinxiang, Henan, 453007, China*

\*Corresponding author. Email: [kyang@fzu.edu.cn](mailto:kyang@fzu.edu.cn); [qsong@fzu.edu.cn](mailto:qsong@fzu.edu.cn)

## Table of Content

|                                                                                                       |    |
|-------------------------------------------------------------------------------------------------------|----|
| 1. General information .....                                                                          | 1  |
| 2. General Procedure for the Synthesis of 2-Aminostyrenes.....                                        | 1  |
| 3. Comparison of GC-MS data between $^{11}\text{B}$ - <b>3a</b> and $^{10}\text{B}$ - <b>3a</b> ..... | 3  |
| 4. General procedure for the synthesis of $^{10}\text{B}$ -enriched 2,1-borazaronaphthalenes.....     | 3  |
| 5. Synthetic transformations .....                                                                    | 8  |
| 6. Control experiments .....                                                                          | 10 |
| 7. References .....                                                                                   | 12 |
| 8. NMR Spectra.....                                                                                   | 13 |

## 1. General information

Unless otherwise noted, materials obtained from commercial suppliers were used without further purification. Flash column chromatography was performed over silica gel (200-300 mesh).  $^1\text{H}$  NMR,  $^{13}\text{C}$  NMR,  $^{19}\text{F}$  NMR spectra were recorded at ambient temperature using Bruker 400M and JEOL 500M spectrometers, chemical shifts (in ppm) were referenced to  $\text{CDCl}_3$  ( $\delta = 7.26$  ppm) as internal standards.  $^{13}\text{C}$  NMR spectra were obtained by using the same NMR spectrometers and were calibrated with  $\text{CDCl}_3$  ( $\delta = 77.0$  ppm). Data for  $^1\text{H}$  NMR are recorded as following abbreviations: multiplicity (s = singlet, d = doublet, t = triplet, m = multiplet), coupling constant (J, Hz). High resolution mass spectroscopy (HRMS) analysis was performed at an Exactive Plus (Thermo Scientific) or Agilent 8890-7250.

## 2. General Procedure for the Synthesis of 2-Aminostyrenes.

**1a**<sup>[1]</sup>, **1n**<sup>[1]</sup>, **1p**<sup>[1]</sup>, **1q**<sup>[2]</sup>, **1r**<sup>[3]</sup> and **1t**<sup>[9]</sup> is a known compound, **1m**, **1o**, **1s** are synthesized as follows:

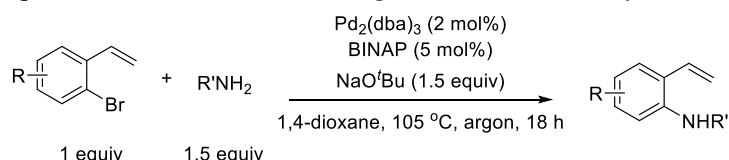

By analogy to a modified literature procedure.<sup>[1]</sup> To a 50 mL Schlenk flask equipped with a stir bar were added Pd<sub>2</sub>(dba)<sub>3</sub> (2 mol%), BINAP (5 mol%), and NaO'Bu (1.5 equiv). The flask was evacuated and filled with argon for three cycles. Dioxane was added under argon, followed by 2-bromostyrene (5.0 mmol, 1 equiv), and the corresponding amine (1.5 equiv). The resulting mixture was heated to 105 °C and stirred until full consumption of 2-bromostyrene was observed by TLC (12~18 h). The reaction mixture was cooled to rt., diluted with EtOAc, and filtered over Celite. After removal of the solvent, the crude reaction mixture was purified by flash column chromatography to afford the desired products **1m** and **1o**.

### *N*-(thiophen-2-ylmethyl)-2-vinyylaniline (**1m**)

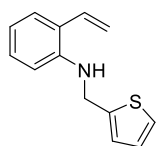

Yellow liquid. Yield: 79% (849.2 mg),  $R_f = 0.46$  (silica gel, PE: EtOAc = 20:1).  $^1\text{H}$  NMR (400 MHz, Chloroform-*d*)  $\delta$  7.27 (d,  $J = 7.5$  Hz, 1H), 7.17 (dd,  $J = 19.2, 6.2$  Hz, 2H), 7.01 – 6.89 (m, 2H), 6.80 – 6.62 (m, 3H), 5.61 (d,  $J = 17.4$  Hz, 1H), 5.30 (d,  $J = 11.0$  Hz, 1H), 4.50 (s, 2H), 4.17 (s, 1H).  $^{13}\text{C}$  NMR (101 MHz, Chloroform-*d*)  $\delta$  144.5, 142.7, 132.7, 128.9, 127.4, 126.8, 125.0, 124.6, 124.6, 118.0, 116.5, 111.1, 77.3, 77.0, 76.7, 43.5. HRMS (EI) calcd for C<sub>13</sub>H<sub>13</sub>NS [M]: 215.0769, found: 215.0763.

### *N*-propyl-2-vinyylaniline (**1o**)

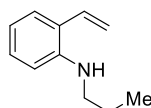

Yellow liquid. Yield: 85 % (685.3 mg),  $R_f$  = 0.6 (silica gel, PE: EtOAc = 20:1).  **$^1\text{H}$  NMR (500 MHz, Chloroform-*d*)**  $\delta$  7.31 (dd,  $J$  = 7.5, 1.5 Hz, 1H), 7.25 – 7.20 (m, 1H), 6.84 – 6.73 (m, 2H), 6.69 (d,  $J$  = 8.1 Hz, 1H), 5.66 (dd,  $J$  = 17.3, 1.6 Hz, 1H), 5.36 (dd,  $J$  = 11.0, 1.6 Hz, 1H), 3.83 (s, 1H), 3.15 (t,  $J$  = 7.1 Hz, 2H), 1.78 – 1.66 (m, 2H), 1.07 (t,  $J$  = 7.4 Hz, 3H).  **$^{13}\text{C}$  NMR (101 MHz, Chloroform-*d*)**  $\delta$  145.4, 132.9, 128.9, 127.4, 124.0, 116.9, 116.1, 110.5, 45.7, 22.6, 11.7. **HRMS (EI)** calcd for  $\text{C}_{11}\text{H}_{15}\text{N}$  [M]: 161.1204, found: 161.1199.

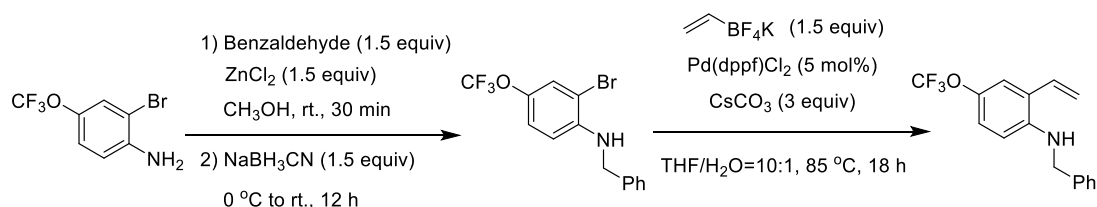

By analogy to a modified literature procedure.<sup>[2]</sup> To a 100 mL Schlenk flask equipped with a stir bar were added  $\text{ZnCl}_2$  (15 mmol, 1.5equiv), The flask was evacuated and filled with argon for three cycles.  $\text{CH}_3\text{OH}$  (30 mL) was added under argon, followed by 2-bromoaniline (10 mmol, 1.0 equiv) and benzaldehyde (15 mmol, 1.5 equiv). The mixture was stirred at room temperature for 30 min, then cool to 0 °C and added  $\text{NaBH}_3\text{CN}$  (15 mmol, 1.5 equiv). Allow reaction to rise to room temperature overnight. The reaction was quenched by saturated  $\text{NH}_4\text{Cl}$  solution, the aqueous layer was extracted with ethyl acetate. The combined organic layers were dried over anhydrous  $\text{Na}_2\text{SO}_4$ . Removal of the solvent, the crude reaction mixture was purified by flash column chromatography to afford *N*-benzyl-2-bromo-4-(trifluoromethoxy)aniline (3.08 g, 89%).

By analogy to a modified literature procedure.<sup>[1]</sup> To a 50 mL Schlenk flask equipped with a stir bar were added  $\text{Pd}(\text{dppf})\text{Cl}_2$  (0.25 mmol, 5 mol%),  $\text{CsCO}_3$  (15 mmol, 3 equiv), and Potassium vinyltrifluoroborate (7.5 mmol, 1.5 equiv). The flask was evacuated and filled with argon for three cycles. THF (20 mL) and  $\text{H}_2\text{O}$  (2 mL) was added under argon, followed *N*-benzyl-2-bromo-4-(trifluoromethoxy)aniline (5 mmol, 1.0 equiv). The resulting mixture was heated to 85 °C and stirred until full consumption of *N*-benzyl-2-bromo-4-(trifluoromethoxy)aniline was observed by TLC (12~18 h). The reaction mixture was cooled to rt., diluted with EtOAc, and filtered over Celite. The filtrate were dried over anhydrous  $\text{Na}_2\text{SO}_4$ . Removal of the solvent, the crude reaction mixture was purified by flash column chromatography to afford **1s** (1.0841g, 74%).

#### ***N*-benzyl-4-(trifluoromethoxy)-2-vinylaniline (1s)**

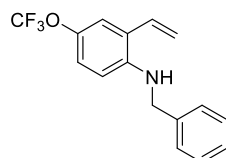

Borwn liquid. Yield: 74% (1.0841 g),  $R_f$  = 0.4 (silica gel, PE:EA = 20:1).  **$^1\text{H}$  NMR (400 MHz, Chloroform-*d*)**  $\delta$  7.41 – 7.24 (m, 5H), 7.14 (s, 1H), 6.98 (d,  $J$  = 8.7 Hz, 1H), 6.70 (dd,  $J$  = 17.2, 11.0 Hz, 1H), 6.54 (d,  $J$  = 8.8 Hz, 1H), 5.63 (d,  $J$  = 17.3 Hz, 1H), 5.36 (d,  $J$  = 11.0 Hz, 1H), 4.32 (s, 2H), 4.17 (s, 1H).  **$^{19}\text{F}$  NMR (376 MHz, Chloroform-*d*)**  $\delta$  -58.29.  **$^{13}\text{C}$  NMR (101 MHz, Chloroform-*d*)**  $\delta$  143.7, 140.5, 138.7, 131.6, 128.7, 127.4, 127.4, 125.0, 121.7, 120.7 (q,  $J$  = 255.5 Hz), 120.4, 117.8, 111.2, 48.4. **HRMS (EI)** calcd for  $\text{C}_{16}\text{H}_{14}\text{F}_3\text{NO}$  [M]: 293.1027, found: 293.1027.

### 3. Comparison of GC-MS data between $^{11}\text{B}$ -3a and $^{10}\text{B}$ -3a

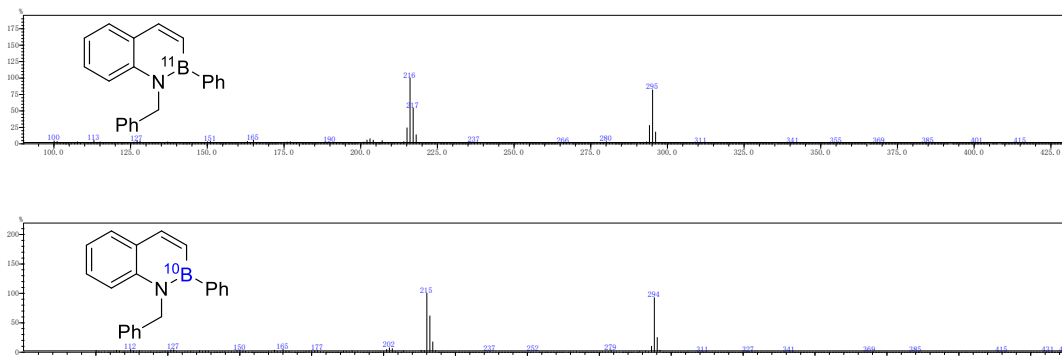

### 4. General procedure for the synthesis of $^{10}\text{B}$ -enriched 2,1-borazaronaphthalenes

In argon, 2-Aminostyrene (0.5 mmol, 1.0 equiv) was transferred to the 25 mL Young tube with 1.5 mL dry toluene and then added to  $^{10}\text{BF}_3 \cdot \text{OEt}_2$  (0.5 mmol, 1.0 equiv), DIPEA (1.0 mmol, 2.0 equiv),  $\text{SiCl}_4$  (0.5 mmol, 1.0 equiv). The resulting mixture was heated to 90 °C. After stirring for 5 hours, the mixture was cooled to -30 °C, then added  $\text{RMgBr}$  (1.5 mmol, 3.0 equiv) in argon. The resulting mixture allow to rise to room temperature and stir for 12 h. The reaction was quenched by saturated  $\text{NH}_4\text{Cl}$  solution, the aqueous layer was extracted with ethyl acetate. The combined organic layers were dried over anhydrous  $\text{Na}_2\text{SO}_4$ . Removal of the solvent, the crude reaction mixture was purified by flash column chromatography to afford the desired products **3a-3s**.

#### 1-benzyl-2-phenyl-1,2-dihydrobenzo[e][1,2]azaborinine-2- $^{10}\text{B}$ (**3a**)

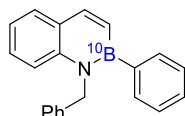

White solid, mp: 100 - 102 °C. Yield: 87% (128.4 mg).  $R_f$  = 0.6 (silica gel, PE: EtOAc = 20:1).  $^1\text{H}$  NMR (400 MHz,  $\text{CHCl}_3$ - $d$ )  $\delta$  8.11 (d,  $J$  = 11.3 Hz, 1H), 7.68 (d,  $J$  = 7.8 Hz, 1H), 7.55 – 7.49 (m, 2H), 7.35 – 7.24 (m, 7H), 7.23 – 7.14 (m, 2H), 7.12 (s, 1H), 7.10 (s, 1H), 7.05 (d,  $J$  = 11.3 Hz, 1H), 5.42 (s, 2H).  $^{13}\text{C}$  NMR (101 MHz,  $\text{CHCl}_3$ - $d$ )  $\delta$  145.4, 141.1, 139.3, 132.5, 130.2, 128.7, 128.5, 127.9, 127.7, 127.3, 126.8, 125.7, 121.0, 117.0, 52.4. HRMS (EI) calcd for  $\text{C}_{21}\text{H}_{18}^{10}\text{BN}$  [M]: 294.1569, found: 294.1570.

#### 1-benzyl-2-(3-methoxyphenyl)-1,2-dihydrobenzo[e][1,2]azaborinine-2- $^{10}\text{B}$ (**3b**)

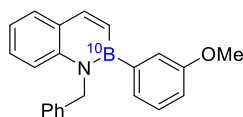

White solid, mp: 99 - 101 °C. Yield: 85% (137.47 mg).  $R_f$  = 0.5 (silica gel, PE: EtOAc = 20:1).  $^1\text{H}$  NMR (400 MHz,  $\text{CHCl}_3$ - $d$ )  $\delta$  8.12 (d,  $J$  = 11.3 Hz, 1H), 7.70 (d,  $J$  = 7.7 Hz, 1H), 7.34 (d,  $J$  = 3.7 Hz, 2H), 7.31 – 7.16 (m, 5H), 7.14 – 7.09 (m, 3H), 7.08 – 7.01 (m, 2H), 6.87 (d,  $J$  = 8.0 Hz, 1H), 5.43 (s,

2H), 3.59 (s, 3H).  $^{13}\text{C}$  NMR (101 MHz, Chloroform-*d*)  $\delta$  158.8, 145.4, 141.2, 139.3, 130.3, 128.9, 128.7, 128.6, 127.3, 126.8, 125.7, 124.9, 121.0, 117.1, 117.0, 114.1, 54.8, 52.5. HRMS (EI) calcd for  $\text{C}_{22}\text{H}_{20}^{10}\text{BNO}$  [M]: 324.1674, found: 324.1671.

**1-benzyl-2-(4-chlorophenyl)-1,2-dihydrobenzo[*e*][1,2]azaborinine-2- $^{10}\text{B}$  (3c)**

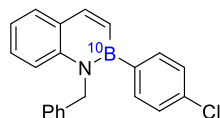

White solid, mp: 118 - 120 °C. Yield: 77% (126.7 mg).  $R_f$  = 0.6 (silica gel, PE: EtOAc = 20:1).  $^1\text{H}$  NMR (400 MHz, Chloroform-*d*)  $\delta$  8.19 (d,  $J$  = 11.3 Hz, 1H), 7.77 (d,  $J$  = 7.7 Hz, 1H), 7.50 (d,  $J$  = 7.7 Hz, 2H), 7.43 – 7.33 (m, 6H), 7.32 – 7.24 (m, 2H), 7.16 (d,  $J$  = 7.5 Hz, 2H), 7.07 (d,  $J$  = 11.3 Hz, 1H), 5.45 (s, 2H).  $^{13}\text{C}$  NMR (101 MHz, Chloroform-*d*)  $\delta$  145.7, 141.1, 139.0, 134.2, 133.9, 130.3, 128.8, 128.7, 127.9, 127.3, 126.9, 125.6, 121.2, 117.0, 52.4. HRMS (EI) calcd for  $\text{C}_{21}\text{H}_{17}^{10}\text{BClN}$  [M]: 328.1179, found: 328.1174.

**1-benzyl-2-mesityl-1,2-dihydrobenzo[*e*][1,2]azaborinine-2- $^{10}\text{B}$  (3d)**

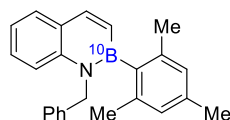

Yellow oil. Yield: 45% (76.2 mg).  $R_f$  = 0.6 (silica gel, PE: EtOAc = 20:1).  $^1\text{H}$  NMR (400 MHz, Chloroform-*d*)  $\delta$  8.08 (d,  $J$  = 11.3 Hz, 1H), 7.70 (d,  $J$  = 7.6 Hz, 1H), 7.32 (s, 2H), 7.22 – 7.07 (m, 4H), 7.01 – 6.88 (m, 3H), 6.86 – 6.75 (m, 2H), 5.25 (s, 2H), 2.28 (s, 3H), 2.10 (s, 6H).  $^{13}\text{C}$  NMR (101 MHz, Chloroform-*d*)  $\delta$  145.1, 141.3, 139.2, 138.6, 136.9, 130.3, 128.4, 128.2, 127.3, 127.3, 126.5, 125.9, 120.9, 117.1, 51.9, 22.6, 21.1. HRMS (EI) calcd for  $\text{C}_{24}\text{H}_{24}^{10}\text{BN}$  [M]: 336.2038, found: 336.2037.

**2-([1,1'-biphenyl]-4-yl)-1-benzyl-1,2-dihydrobenzo[*e*][1,2]azaborinine-2- $^{10}\text{B}$  (3e)**

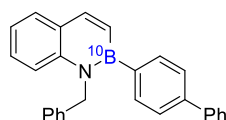

White solid, mp: 207 - 209 °C. Yield: 67% (128.4 mg).  $R_f$  = 0.5 (silica gel, PE: EtOAc = 20:1).  $^1\text{H}$  NMR (500 MHz, Chloroform-*d*)  $\delta$  8.14 (d,  $J$  = 11.4 Hz, 1H), 7.71 (d,  $J$  = 7.6 Hz, 1H), 7.63 – 7.58 (m, 4H), 7.58 – 7.55 (m, 2H), 7.45 – 7.38 (m, 2H), 7.36 – 7.28 (m, 5H), 7.25 – 7.17 (m, 2H), 7.15 (d,  $J$  = 7.2 Hz, 2H), 7.10 (d,  $J$  = 11.3 Hz, 1H), 5.48 (s, 2H).  $^{13}\text{C}$  NMR (101 MHz, Chloroform-*d*)  $\delta$  145.4, 141.2, 141.1, 140.6, 139.3, 133.2, 130.3, 128.8, 128.7, 128.6, 127.3, 127.2, 127.0, 126.8, 126.4, 125.7, 121.0, 117.0, 52.5. HRMS (ESI) calcd for  $\text{C}_{27}\text{H}_{22}^{10}\text{BN}$  [M+H] $^+$ : 371.1955, found: 371.1947.

**1-benzyl-2-ethynyl-1,2-dihydrobenzo[*e*][1,2]azaborinine-2- $^{10}\text{B}$  (3f)**

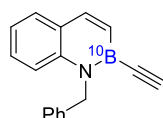

White solid, mp: 75 - 76 °C. Yield: 77% (93.3 mg).  $R_f$  = 0.6 (silica gel, PE: EtOAc = 20:1).  $^1\text{H}$  NMR (400 MHz, Chloroform-*d*)  $\delta$  8.05 (d,  $J$  = 11.4 Hz, 1H), 7.64 (d,  $J$  = 7.7 Hz, 1H), 7.40 – 7.31 (m, 2H), 7.30 – 7.24 (m, 2H), 7.23 – 7.12 (m, 4H), 7.03 (d,  $J$  = 11.4 Hz, 1H), 5.64 (s, 2H), 3.03 (s, 1H).  $^{13}\text{C}$  NMR

(**101 MHz, Chloroform-*d***)  $\delta$  145.6, 140.8, 138.3, 130.3, 128.8, 128.6, 127.1, 127.0, 126.1, 121.3, 116.5, 95.9, 53.6. **HRMS (EI)** calcd for C<sub>17</sub>H<sub>14</sub><sup>10</sup>BN [M]: 242.1256, found: 242.1257.

**1-benzyl-2-vinyl-1,2-dihydrobenzo[*e*][1,2]azaborinine-2-<sup>10</sup>B (3g)**

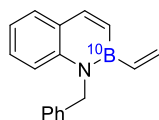

White solid, mp: 52 - 54 °C. Yield: 58% (70.7 mg). R<sub>f</sub> = 0.6 (silica gel, PE: EtOAc = 20:1). **<sup>1</sup>H NMR (400 MHz, Chloroform-*d*)**  $\delta$  8.02 (d, *J* = 11.5 Hz, 1H), 7.61 (d, *J* = 7.7 Hz, 1H), 7.36 – 7.17 (m, 5H), 7.17 – 7.09 (m, 4H), 6.63 (dd, *J* = 19.4, 13.6 Hz, 1H), 6.26 (dd, *J* = 19.4, 3.6 Hz, 1H), 6.05 (dd, *J* = 13.5, 3.4 Hz, 1H), 5.38 (s, 2H). **<sup>13</sup>C NMR (101 MHz, Chloroform-*d*)**  $\delta$  145.0, 141.4, 138.6, 133.7, 130.1, 128.7, 128.4, 127.2, 126.9, 125.8, 120.7, 116.1, 51.1. **HRMS (EI)** calcd for C<sub>17</sub>H<sub>16</sub><sup>10</sup>BN [M]: 244.1412, found: 244.1410.

**(*E*)-1-benzyl-2-(prop-1-en-1-yl)-1,2-dihydrobenzo[*e*][1,2]azaborinine-2-<sup>10</sup>B (3h)**

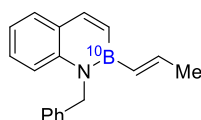

White solid, mp: 57 - 59 °C. Yield: 70% (89.7 mg). R<sub>f</sub> = 0.6 (silica gel, PE: EtOAc = 20:1). **<sup>1</sup>H NMR (500 MHz, Chloroform-*d*)**  $\delta$  8.05 (d, *J* = 11.4 Hz, 1H), 7.69 – 7.65 (m, 1H), 7.37 – 7.27 (m, 4H), 7.23 (t, *J* = 7.3 Hz, 1H), 7.19 – 7.12 (m, 3H), 7.06 (d, *J* = 11.4 Hz, 1H), 6.39 – 6.30 (m, 1H), 6.12 – 6.07 (m, 1H), 5.37 (s, 2H), 1.91 (dd, *J* = 6.8, 1.5 Hz, 3H). **<sup>13</sup>C NMR (126 MHz, Chloroform-*d*)**  $\delta$  144.4, 141.5, 139.4, 138.6, 130.1, 128.6, 128.3, 126.9, 126.8, 125.8, 120.6, 116.1, 51.7, 18.5. **HRMS (EI)** calcd for C<sub>18</sub>H<sub>18</sub><sup>10</sup>BN [M]: 258.1569, found: 258.1561.

**2-allyl-1-benzyl-1,2-dihydrobenzo[*e*][1,2]azaborinine-2-<sup>10</sup>B (3i)**

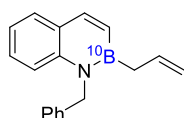

Colorless oil. Yield: 67% (87.0 mg). R<sub>f</sub> = 0.6 (silica gel, PE: EtOAc = 20:1). **<sup>1</sup>H NMR (400 MHz, Chloroform-*d*)**  $\delta$  7.98 (d, *J* = 11.4 Hz, 1H), 7.62 (d, *J* = 7.7 Hz, 1H), 7.34 – 7.24 (m, 4H), 7.22 – 7.17 (m, 1H), 7.14 – 7.06 (m, 3H), 6.94 (d, *J* = 11.4 Hz, 1H), 6.18 – 6.02 (m, 1H), 5.31 (s, 2H), 5.05 – 4.90 (m, 2H), 2.26 (d, *J* = 7.6 Hz, 2H). **<sup>13</sup>C NMR (101 MHz, Chloroform-*d*)**  $\delta$  144.9, 141.5, 138.3, 137.4, 130.2, 128.7, 128.4, 126.9, 126.8, 125.7, 120.6, 116.0, 114.0, 50.5. **HRMS (EI)** calcd for C<sub>18</sub>H<sub>18</sub><sup>10</sup>BN [M]: 258.1569, found: 258.1563.

**1-benzyl-2-isopropyl-1,2-dihydrobenzo[*e*][1,2]azaborinine-2-<sup>10</sup>B (3j)**

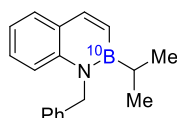

White solid, mp: 66 - 68 °C. Yield: 67% (87.9 mg). R<sub>f</sub> = 0.7 (silica gel, PE: EtOAc = 20:1). **<sup>1</sup>H NMR (400 MHz, Chloroform-*d*)**  $\delta$  8.01 (d, *J* = 11.5 Hz, 1H), 7.60 (d, *J* = 7.7 Hz, 1H), 7.31 – 7.24 (m, 4H), 7.22 – 7.16 (m, 1H), 7.14 – 7.06 (m, 3H), 6.99 (d, *J* = 11.5 Hz, 1H), 5.35 (s, 2H), 1.70 – 1.56 (m, 1H), 1.13 (d, *J* = 7.1 Hz, 6H). **<sup>13</sup>C NMR (101 MHz, Chloroform-*d*)**  $\delta$  145.2, 141.3, 138.9, 130.1, 128.7, 128.2,

126.8, 126.8, 125.7, 120.5, 116.3, 50.2, 20.6. **HRMS (EI)** calcd for C<sub>18</sub>H<sub>20</sub><sup>10</sup>BN [M]: 260.1725, found: 260.1723.

**1-benzyl-2-cyclohexyl-1,2-dihydrobenzo[e][1,2]azaborinine-2-<sup>10</sup>B (3k)**

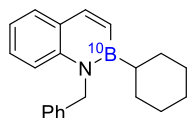

Colorless oil, Yield: 75% (113.3 mg). R<sub>f</sub> = 0.7 (silica gel, PE: EtOAc = 20:1). **<sup>1</sup>H NMR (500 MHz, Chloroform-*d*)** δ 7.99 (d, *J* = 11.6 Hz, 1H), 7.62 – 7.55 (m, 1H), 7.28 – 7.22 (m, 4H), 7.19 (dd, *J* = 8.7, 6.5 Hz, 1H), 7.10 – 7.06 (m, 3H), 7.00 (d, *J* = 11.5 Hz, 1H), 5.34 (s, 2H), 1.78 – 1.67 (m, 6H), 1.54 – 1.44 (m, 2H), 1.32 – 1.24 (m, 3H). **<sup>13</sup>C NMR (101 MHz, Chloroform-*d*)** δ 145.0, 141.3, 139.0, 130.0, 128.7, 128.2, 126.8, 126.8, 125.7, 120.4, 116.4, 50.3, 30.3, 27.8, 27.0. **HRMS (EI)** calcd for C<sub>21</sub>H<sub>24</sub><sup>10</sup>BN [M]: 300.2038, found: 300.2034.

**1-benzyl-2-methyl-1,2-dihydrobenzo[e][1,2]azaborinine-2-<sup>10</sup>B (3l)**

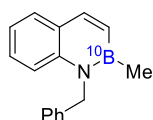

White solid, mp: 57 - 59 °C. Yield: 79% (92.1 mg). R<sub>f</sub> = 0.7 (silica gel, PE: EtOAc = 20:1). **<sup>1</sup>H NMR (400 MHz, Chloroform-*d*)** δ 7.92 (d, *J* = 11.3 Hz, 1H), 7.59 (d, *J* = 7.7 Hz, 1H), 7.30 – 7.21 (m, 4H), 7.20 – 7.15 (m, 1H), 7.08 (d, *J* = 7.3 Hz, 3H), 6.87 (d, *J* = 11.3 Hz, 1H), 5.27 (s, 2H), 0.83 (s, 3H). **<sup>13</sup>C NMR (101 MHz, Chloroform-*d*)** δ 144.1, 141.7, 138.5, 130.1, 128.7, 128.2, 126.8, 125.8, 120.3, 115.8, 50.9. **HRMS (EI)** calcd for C<sub>16</sub>H<sub>16</sub><sup>10</sup>BN [M]: 232.1422, found: 232.1411.

**2-phenyl-1-(thiophen-2-ylmethyl)-1,2-dihydrobenzo[e][1,2]azaborinine-2-<sup>10</sup>B (3m)**

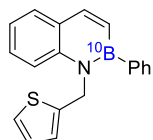

Brown solid, mp: 92 - 94 °C. Yield: 61% (91.9 mg). R<sub>f</sub> = 0.6 (silica gel, PE: EtOAc = 20:1). **<sup>1</sup>H NMR (400 MHz, Chloroform-*d*)** δ 8.08 (d, *J* = 11.3 Hz, 1H), 7.68 (d, *J* = 7.7 Hz, 1H), 7.63 – 7.56 (m, 2H), 7.53 (d, *J* = 8.6 Hz, 1H), 7.43 – 7.32 (m, 4H), 7.20 (t, *J* = 7.4 Hz, 1H), 7.13 (d, *J* = 5.0 Hz, 1H), 7.00 (d, *J* = 11.3 Hz, 1H), 6.91 – 6.86 (m, 1H), 6.77 (s, 1H), 5.52 (s, 2H). **<sup>13</sup>C NMR (101 MHz, Chloroform-*d*)** δ 145.4, 143.2, 141.0, 132.5, 130.3, 128.6, 128.0, 127.7, 127.3, 127.0, 124.2, 123.9, 121.2, 116.4, 48.2. **HRMS (EI)** calcd for C<sub>19</sub>H<sub>16</sub><sup>10</sup>BNS [M]: 300.1133, found: 300.1133.

**1,2-diphenyl-1,2-dihydrobenzo[e][1,2]azaborinine-2-<sup>10</sup>B (3n)**

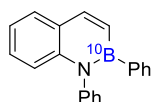

White solid, mp: 119 - 121 °C. Yield: 76% (106.2 mg). R<sub>f</sub> = 0.6 (silica gel, PE: EtOAc = 20:1). **<sup>1</sup>H NMR (400 MHz, Chloroform-*d*)** δ 8.15 (d, *J* = 11.4 Hz, 1H), 7.70 (d, *J* = 7.7 Hz, 1H), 7.43 – 7.27 (m, 4H), 7.24 – 7.09 (m, 9H), 6.94 (d, *J* = 8.5 Hz, 1H). **<sup>13</sup>C NMR (101 MHz, Chloroform-*d*)** δ 145.2, 143.8,

142.7, 133.8, 129.7, 129.4, 129.3, 128.2, 127.6, 127.1, 127.1, 126.1, 121.2, 117.6. **HRMS (EI)** calcd for  $C_{20}H_{16}^{10}BN$  [M]: 280.1412, found: 280.1416.

**2-phenyl-1-propyl-1,2-dihydrobenzo[e][1,2]azaborinine-2- $^{10}B$  (3o)**

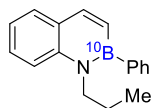

Colorless oil. Yield: 73% (89.5 mg).  $R_f$  = 0.65 (silica gel, PE: EtOAc = 20:1).  **$^1H$  NMR (500 MHz, Chloroform-*d*)**  $\delta$  8.02 (d,  $J$  = 11.3 Hz, 1H), 7.69 (dd,  $J$  = 7.8, 1.4 Hz, 1H), 7.60 – 7.48 (m, 4H), 7.44 – 7.39 (m, 2H), 7.39 – 7.34 (m, 1H), 7.25 – 7.20 (m, 1H), 6.90 (d,  $J$  = 11.3 Hz, 1H), 4.15 – 4.05 (m, 2H), 1.86 – 1.76 (m, 2H), 0.85 (t,  $J$  = 7.4 Hz, 3H).  **$^{13}C$  NMR (126 MHz, Chloroform-*d*)**  $\delta$  144.7, 140.9, 132.2, 130.5, 128.4, 127.6, 127.4, 127.2, 120.7, 115.6, 49.5, 23.4, 11.2. **HRMS (EI)** calcd for  $C_{17}H_{18}^{10}BN$  [M]: 246.1569, found: 246.1566.

**2-phenyl-1,2-dihydrobenzo[e][1,2]azaborinine-2- $^{10}B$  (3p)**

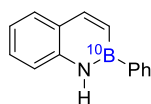

White solid, mp: 134 - 136 °C. Yield: 45% (45.5 mg).  $R_f$  = 0.5 (silica gel, PE: EtOAc = 20:1).  **$^1H$  NMR (400 MHz, Chloroform-*d*)**  $\delta$  8.12 (d,  $J$  = 11.3 Hz, 2H), 7.90 (d,  $J$  = 6.2 Hz, 2H), 7.64 (d,  $J$  = 7.7 Hz, 1H), 7.52 – 7.39 (m, 4H), 7.33 – 7.24 (m, 2H), 7.18 (t,  $J$  = 7.6 Hz, 1H).  **$^{13}C$  NMR (101 MHz, Chloroform-*d*)**  $\delta$  145.5, 140.1, 132.7, 129.6, 129.4, 128.4, 128.2, 125.7, 121.0, 118.2. **HRMS (EI)** calcd for  $C_{14}H_{12}^{10}BN$  [M]: 204.1099, found: 204.1095.

**1-benzyl-6-methyl-2-phenyl-1,2-dihydrobenzo[e][1,2]azaborinine-2- $^{10}B$  (3q)**

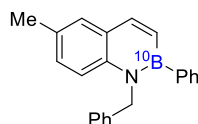

White solid, mp: 76 - 78 °C. Yield: 91% (141.2 mg).  $R_f$  = 0.6 (silica gel, PE: EtOAc = 20:1).  **$^1H$  NMR (400 MHz, Chloroform-*d*)**  $\delta$  8.07 (d,  $J$  = 11.3 Hz, 1H), 7.57 (d,  $J$  = 7.8 Hz, 1H), 7.51 (s, 2H), 7.34 – 7.25 (m, 5H), 7.22 (d,  $J$  = 7.1 Hz, 1H), 7.12 (d,  $J$  = 8.5 Hz, 3H), 7.04 – 6.92 (m, 2H), 5.40 (s, 2H), 2.31 (s, 3H).  **$^{13}C$  NMR (101 MHz, Chloroform-*d*)**  $\delta$  145.1, 141.2, 139.4, 138.7, 132.5, 130.1, 128.7, 127.8, 127.6, 126.7, 125.7, 125.1, 122.4, 117.1, 52.3, 22.2. **HRMS (EI)** calcd for  $C_{22}H_{20}^{10}BN$  [M]: 308.1725, found: 308.1723.

**1-benzyl-6-methoxy-2-phenyl-1,2-dihydrobenzo[e][1,2]azaborinine-2- $^{10}B$  (3r)**

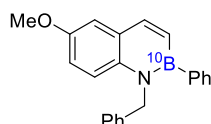

White solid, mp: 88 - 90 °C. Yield: 66% (107.4 mg).  $R_f$  = 0.5 (silica gel, PE: EtOAc = 20:1).  **$^1H$  NMR (400 MHz, Chloroform-*d*)**  $\delta$  8.06 (d,  $J$  = 11.3 Hz, 1H), 7.52 (s, 2H), 7.36 – 7.18 (m, 7H), 7.16 – 7.03 (m, 4H), 6.96 (dd,  $J$  = 9.2, 2.5 Hz, 1H), 5.41 (s, 2H), 3.84 (s, 3H).  **$^{13}C$  NMR (101 MHz, Chloroform-*d*)**



$\delta$  153.7, 144.8, 139.4, 135.7, 132.6, 128.7, 128.0, 127.8, 127.7, 126.8, 125.7, 118.2, 117.2, 111.7, 55.5, 52.5. **HRMS (EI)** calcd for  $C_{22}H_{10}^{10}BNO$  [M]: 324.1674 found: 324.1674.

**1-benzyl-2-phenyl-6-(trifluoromethoxy)-1,2-dihydrobenzo[e][1,2]azaborinine-2- $^{10}B$  (3s)**

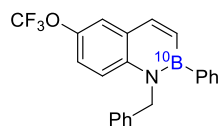

Colorless oil. Yield: 71% (133.6 mg).  $R_f$  = 0.6 (silica gel, PE: EtOAc = 20:1).  **$^1H$  NMR (400 MHz, Chloroform-*d*)**  $\delta$  8.05 (d,  $J$  = 11.4 Hz, 1H), 7.59 – 7.46 (m, 3H), 7.36 – 7.27 (m, 6H), 7.27 – 7.21 (m, 1H), 7.18 (d,  $J$  = 9.3 Hz, 1H), 7.15 – 7.08 (m, 3H), 5.42 (s, 2H).  **$^{19}F$  NMR (471 MHz, Chloroform-*d*)**  $\delta$  -57.86.  **$^{13}C$  NMR (101 MHz, Chloroform-*d*)**  $\delta$  144.6, 142.9, 139.6, 138.7, 132.5, 128.9, 128.2, 127.9, 127.8, 127.1, 125.6, 124.4, 121.9, 121.6, 121.5, 119.3, 118.4, 116.8, 52.7. **HRMS (EI)** calcd for  $C_{22}H_{17}^{10}BF_3NO$  [M]: 378.1392, found: 378.1390.

**1-benzyl-2,3-diphenyl-1,2-dihydrobenzo[e][1,2]azaborinine-2- $^{10}B$  (3t)**

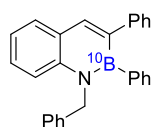

Yellow oil, yield: 31% (57.7 mg).  $R_f$  = 0.5 (silica gel, PE: EtOAc = 20:1).  **$^1H$  NMR (400 MHz, Chloroform-*d*)**  $\delta$  8.09 (s, 1H), 7.75 (d,  $J$  = 7.6 Hz, 1H), 7.34 (s, 2H), 7.29 – 7.08 (m, 16H), 5.36 (s, 2H).  **$^{13}C$  NMR (101 MHz, Chloroform-*d*)**  $\delta$  144.3, 143.4, 140.4, 139.1, 132.1, 130.4, 128.9, 128.7, 128.5, 127.6, 127.4, 127.3, 126.8, 126.7, 125.7, 125.7, 121.4, 117.0, 52.9. **HRMS (EI)** calcd for  $C_{27}H_{22}^{10}BN$  [M]: 370.1882, found: 370.1880.

## 5. Synthetic transformations

**1-benzyl-3-iodo-2-phenyl-1,2-dihydrobenzo[e][1,2]azaborinine-2- $^{10}B$  (4)**

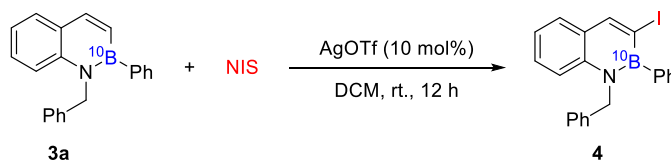

By analogy to a modified literature procedure.<sup>[4]</sup> In argon, a 50 mL Schlenk tube was charged with **3a** (2.0 mmol, 1 equiv), AgOTf (10 mol%) and dry DCM (5 mL). Then, NIS (2.2 mmol, 1.1 equiv) in dry DCM (15 mL) was slowly added dropwise. The mixture was stirred at room temperature for 12 h. Upon completion, proper amount of silica gel was added to the reaction mixture. After removal of the solvent, the crude reaction mixture was purified on silica gel to afford product **4**.

White solid, mp: 136 - 138 °C. Yield: 91% (766.8 mg).  $R_f$  = 0.6 (silica gel, PE: EtOAc = 20:1).  **$^1H$  NMR (500 MHz, Chloroform-*d*)**  $\delta$  8.81 (s, 1H), 7.59 (dd,  $J$  = 7.8, 1.4 Hz, 1H), 7.41 – 7.36 (m, 2H), 7.35 – 7.27 (m, 5H), 7.26 – 7.21 (m, 2H), 7.20 – 7.13 (m, 2H), 7.02 (d,  $J$  = 7.2 Hz, 2H), 5.29 (s, 2H).  **$^{13}C$  NMR (101 MHz, Chloroform-*d*)**  $\delta$  153.4, 140.4, 138.3, 131.3, 129.4, 129.2, 128.7, 128.0, 128.0, 127.6, 126.9, 125.5, 121.7, 117.3, 53.9. **HRMS (EI)** calcd for  $C_{21}H_{17}^{10}BIN$  [M]: 420.0535, found: 420.0539.

### 1-benzyl-2,3-diphenyl-1,2-dihydrobenzo[*e*][1,2]azaborinine-2-<sup>10</sup>B (3t)

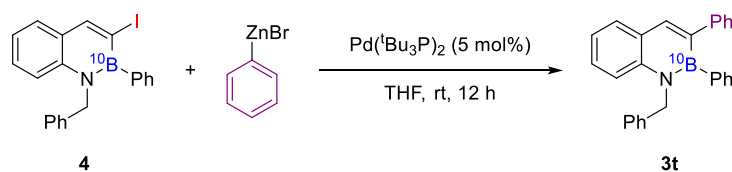

By analogy to a modified literature procedure.<sup>[5]</sup> In a glove box, a 25 mL Schlenk tube was charged with zinc chloride (0.64 mmol, 3.2 equiv) and phenylmagnesium bromide (in THF (1M), 0.32 mmol, 1.6 equiv). The mixture was stirred for 30 minutes. Then, the mixture was charged with **4** (0.2 mmol, 1.0 equiv), bis(tri-*tert*-butylphosphine)palladium (0.005 mmol, 5 mol%), 2 mL of THF and phenylzinc solution prepared in the previous step. The tube was removed from glove box, and stirred for 12 h at room temperature. Upon completion, the solvent was concentrated under reduced pressure and rapidly purified by column chromatography to obtain product **3t** (63.7 mg, 86% yield).

### methyl (*E*)-3-(1-benzyl-2-phenyl-1,2-dihydrobenzo[*e*][1,2] azaborinin-3-yl-2-<sup>10</sup>B)acrylate (**5**)

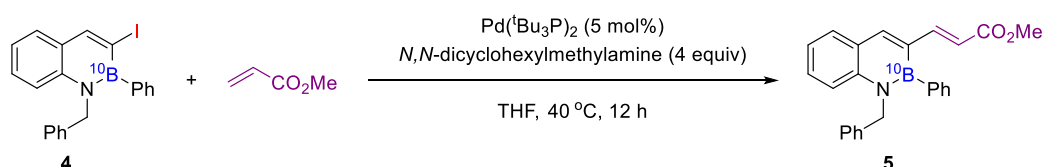

By analogy to a modified literature procedure.<sup>[6]</sup> A 25 mL Young tube was charged with **4** (0.2 mmol, 1 equiv) and Pd(*t*-Bu<sub>3</sub>P)<sub>2</sub> (5 mol%). and *N,N*-dicyclohexylmethylamine (4 equiv). The tube was evacuated and filled with argon for three cycles, then added methyl acrylate (2 equiv), *N,N*-dicyclohexylmethylamine (4 equiv) and dry THF (2 mL) in argon. The mixture was stirred at 40 °C for 12 h. Upon completion, proper amount of silica gel was added to the reaction mixture. After removal of the solvent, the crude reaction mixture was purified on silica gel to afford product **5**.

Yellow solid, mp: 73 - 75 °C. Yield: 79% (59.9 mg). *R*<sub>f</sub> = 0.3 (silica gel, PE: EtOAc = 10:1). <sup>1</sup>H NMR (500 MHz, Chloroform-*d*) δ 8.27 (s, 1H), 7.75 – 7.68 (m, 2H), 7.40 – 7.17 (m, 12H), 7.04 (d, *J* = 7.2 Hz, 2H), 5.90 (d, *J* = 15.9 Hz, 1H), 5.29 (s, 2H), 3.67 (s, 3H). <sup>13</sup>C NMR (101 MHz, Chloroform-*d*) δ 167.9, 148.7, 145.3, 141.4, 138.6, 131.2, 131.1, 129.9, 128.7, 128.0, 127.9, 126.8, 126.3, 125.6, 121.7, 118.2, 117.1, 52.6, 51.4. HRMS (ESI) calcd for C<sub>25</sub>H<sub>22</sub><sup>10</sup>BNO<sub>2</sub> [M+H]<sup>+</sup>: 379.1853, found: 379.1859.

### tert-butyl 4-(1-benzyl-2-phenyl-1,2-dihydrobenzo[*e*][1,2] azaborinin-3-yl-2-<sup>10</sup>B)piperidine-1-carboxylate (**6**)

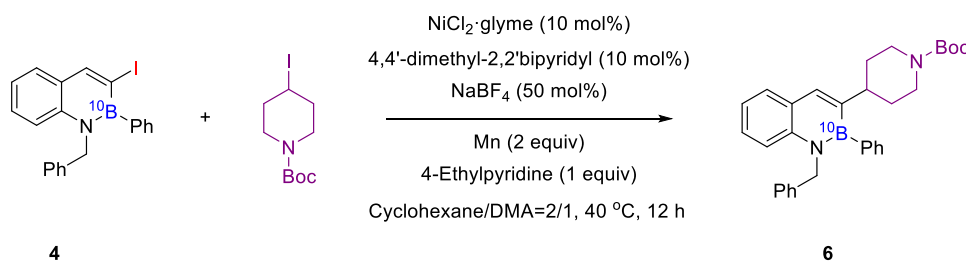

By analogy to a modified literature procedure.<sup>[7]</sup> A 25 mL Young tube was charged with **4** (0.2 mmol, 1equiv), alkyl iodide (2.4 mmol, 1.2 equiv), NiCl<sub>2</sub>·glyme (0.02 mmol, 10 mol%), 4,4'-dimethy-2,2'-bipyridyl (0.02 mmol, 10 mol%), NaBF<sub>4</sub> (0.1 mmol, 50 mol%), Mn (0.4 mmol, 2 equiv). The tube was

evacuated and filled with argon for three cycles, then added 4-Ethylpyridine (0.2 mmol, 1 equiv), dry Cyclohexane (1 mL) and dry DMA (0.5 mL) in argon. The mixture was stirred at 40 °C for 12 h. Upon completion, removal of the solvent, the crude reaction mixture was purified on silica gel to afford product **6**.

Colorless oil. Yield: 93% (87.9 mg).  $R_f = 0.3$  (silica gel, PE: EtOAc = 10:1). **<sup>1</sup>H NMR (400 MHz, Chloroform-*d*)**  $\delta$  7.86 (s, 1H), 7.67 (d,  $J = 7.6$  Hz, 1H), 7.38 – 7.12 (m, 11H), 7.02 (d,  $J = 7.4$  Hz, 2H), 5.23 (s, 2H), 4.11 (s, 2H), 2.59 – 2.40 (m, 3H), 1.74 – 1.63 (m, 2H), 1.56 – 1.36 (m, 11H). **<sup>13</sup>C NMR (101 MHz, Chloroform-*d*)**  $\delta$  154.8, 139.8, 139.6, 138.9, 130.9, 129.9, 128.5, 127.9, 127.7, 127.3, 126.9, 126.7, 125.6, 121.2, 116.7, 79.1, 52.8, 44.6, 39.8, 33.0, 28.5. **HRMS (ESI)** calcd for  $C_{31}H_{35}^{10}BN_2O_2$   $[M+H]^+$ : 478.2901, found: 478.2908.

### 1-benzyl-3-phenylbenzo[*e*][1,2]azaborinin-2(1*H*)-ol-2-<sup>10</sup>B (**7**)

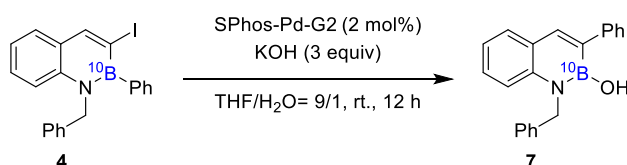

By analogy to a modified literature procedure.<sup>[8]</sup> A 25 mL Schlenk tube was charged with **4** (0.2 mmol, 1 equiv), SPhos-Pd-G2 (0.004 mmol, 2 mol%), KOH (0.6 mmol, 3 equiv). The tube was evacuated and filled with argon for three cycles, then added THF (0.9 mL) and H<sub>2</sub>O (0.1 mL) in argon. The mixture was stirred at room temperature for 12 h. Upon completion, anhydrous sodium sulfate was added, then diatomite and a small amount of silica gel filtration. The desired product **7** is obtained by removing the solvent.

Brown oil, yield: 99% (61.4 mg).  $R_f = 0.5$  (silica gel, PE:EtOAc = 5:1). **<sup>1</sup>H NMR (400 MHz, Chloroform-*d*)**  $\delta$  7.82 (s, 1H), 7.56 (d,  $J = 7.6$  Hz, 1H), 7.48 – 7.43 (m, 4H), 7.34 – 7.16 (m, 8H), 7.03 (d,  $J = 5.9$  Hz, 1H), 5.26 (s, 2H), 4.56 (s, 1H). **<sup>13</sup>C NMR (101 MHz, Chloroform-*d*)**  $\delta$  143.5, 142.4, 141.6, 138.8, 130.2, 129.3, 128.6, 128.6, 127.3, 126.8, 126.7, 126.3, 124.4, 119.7, 115.0, 46.8. **HRMS (EI)** calcd for  $C_{21}H_{18}^{10}BNO$   $[M]$ : 310.1518, found: 310.1519.

## 6. Control experiments

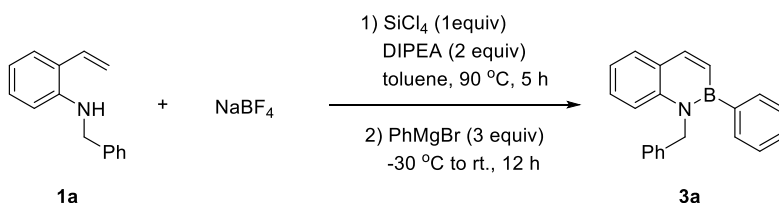

In argon, 2-Aminostyrene (0.5 mmol, 1.0 equiv) was transferred to the 25 mL Young tube with 1.5 ml dry toluene and then added to NaBF<sub>4</sub> (0.5 mmol, 1.0 equiv), DIPEA (1.0 mmol, 2.0 equiv), SiCl<sub>4</sub> (0.5 mmol, 1.0 equiv). The resulting mixture was heated to 90 °C. After stirring for 5 hours, the mixture was cooled to -30 °C, then added PhMgBr (1.5 mmol, 3.0 equiv) in argon. The resulting mixture allow to rise to room temperature and stir for 12 h. The reaction was quenched by saturated NH<sub>4</sub>Cl solution, the aqueous layer was extracted with ethyl acetate. The combined organic layers were dried over anhydrous

Na<sub>2</sub>SO<sub>4</sub>. Removal of the solvent, the crude reaction mixture was purified by flash column chromatography to afford the desired products **3a** (119.7 mg, 81% yield).

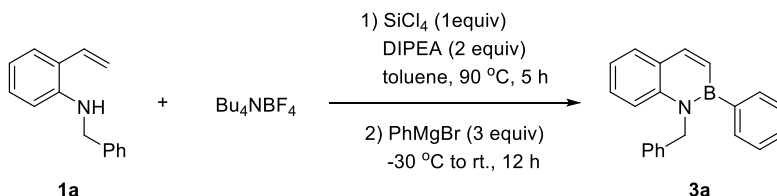

In argon, 2-Aminostyrene (0.5 mmol, 1.0 equiv) was transferred to a 25 mL Young tube with 1.5 ml dry toluene and then added to Bu<sub>4</sub>NBF<sub>4</sub> (0.5 mmol, 1.0 equiv), DIPEA (1.0 mmol, 2.0 equiv), SiCl<sub>4</sub> (0.5 mmol, 1.0 equiv). The resulting mixture was heated to 90 °C. After stirring for 5 hours, the mixture was cooled to -30 °C, then added PhMgBr (1.5 mmol, 3.0 equiv) in argon. The resulting mixture allow to rise to room temperature and stir for 12 h. The reaction was quenched by saturated NH<sub>4</sub>Cl solution, the aqueous layer was extracted with ethyl acetate. The combined organic layers were dried over anhydrous Na<sub>2</sub>SO<sub>4</sub>. Removal of the solvent, the crude reaction mixture was purified by flash column chromatography to afford the desired products **3a** (122.5 mg, 83% yield).

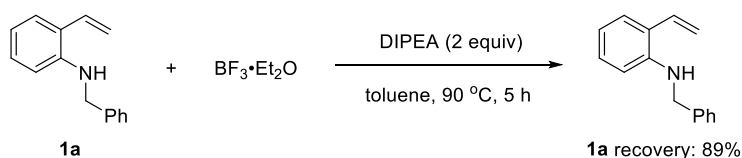

In argon, 2-Aminostyrene **1a** (0.5 mmol, 1.0 equiv) was transferred to the 25 mL Young tube with 1.5 ml dry toluene and then added to BF<sub>3</sub> • Et<sub>2</sub>O (0.5 mmol, 1.0 equiv), DIPEA (1.0 mmol, 2.0 equiv). The resulting mixture was heated to 90 °C. After stir for 5 hours, The mixture was cooled to room temperature. Removal of the solvent, the crude reaction mixture was purified by flash column chromatography to recover **1a** (93.5 mg, 89%).

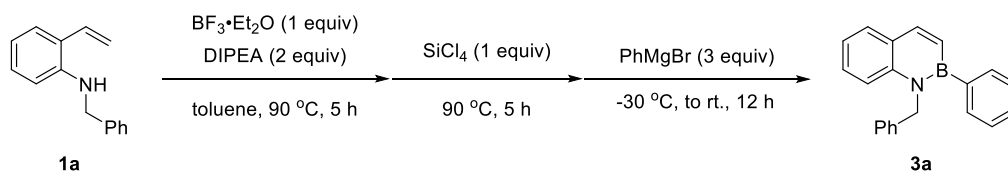

In argon, 2-Aminostyrene **1a** (0.5 mmol, 1.0 equiv) was transferred to a 25 mL Young tube with 1.5 ml dry toluene and then added to BF<sub>3</sub> • Et<sub>2</sub>O (0.5 mmol, 1.0 equiv), DIPEA (1.0 mmol, 2.0 equiv). The resulting mixture was heated to 90 °C. After stirring for 5 hours, the mixture was cooled to room temperature, then SiCl<sub>4</sub> (0.5 mmol, 1.0 equiv) was added. The resulting mixture was heated to 90 °C and stir for another 5 hours. The mixture was cooled to -30 °C and added PhMgBr (1.5 mmol, 3.0 equiv) in argon. The resulting mixture allow to rise to room temperature and stir for 12 h. The reaction was quenched by saturated NH<sub>4</sub>Cl solution, the aqueous layer was extracted with ethyl acetate. The combined organic layers were dried over anhydrous Na<sub>2</sub>SO<sub>4</sub>. Removal of the solvent, the crude reaction mixture was purified by flash column chromatography to afford the desired product **3a** (116.4 mg, 79% yield).

## 7. References

- [1] S. R. Wisniewski, C. L. Guenther, O. A. Argintaru, G. A. Molander, A Convergent, Modular Approach to Functionalized 2,1-Borazaronaphthalenes from 2-Aminostyrenes and Potassium Organotrifluoroborates, *J. Org. Chem.*, 2014, **79**, 365–378.
- [2] A. Kessler, C. M. Coleman, P. Charoenying, D. F. O'Shea, Indole Synthesis by Controlled Carbolithiation of *o*-Aminostyrenes, *J. Org. Chem.*, 2004, **69**, 7836–7846.
- [3] G. Satish, A. Polu, T. Ramar, A. Ilangoan, Iodine-Mediated C–H Functionalization of sp, sp<sup>2</sup>, and sp<sup>3</sup> Carbon: A Unified Multisubstrate Domino Approach for Isatin Synthesis, *J. Org. Chem.*, 2015, **80**, 5167–5175.
- [4] Y. He, H. Wang, Y. Zhou, K. Yang, Q. Song, Divergent synthesis of 5- and 4-(2,1-azaborine) substituted isoxazoles via regioselective [3+2] cycloadditions of nitrile oxides and B-ethynyl-1,2-azaborines, *Org. Chem. Front.*, 2023, **10**, 127-132.
- [5] A. N. Brown, B. Li, S.-Y. Liu, Negishi Cross-Coupling Is Compatible with a Reactive B–Cl Bond: Development of a Versatile Late-Stage Functionalization of 1,2-Azaborines and Its Application to the Synthesis of New BN Isosteres of Naphthalene and Indenyl, *J. Am. Chem. Soc.*, 2015, **137**, 8932–8935.
- [6] M. Xu, X. You, Y. Zhang, Y. Lu, K. Tan, L. Yang, Q. Cai, Enantioselective Synthesis of Axially Chiral Biaryls by Diels–Alder/Retro-Diels–Alder Reaction of 2-Pyrones with Alkynes, *J. Am. Chem. Soc.*, 2021, **143**, 8993-9001.
- [7] G. A. Molander, S. R. Wisniewski, K. M. Traister, Reductive Cross-Coupling of 3-Bromo-2,1-borazaronaphthalenes with Alkyl Iodides, *Org. Lett.*, 2014, **16**, 3692–3695.
- [8] G. A. Molander, S. R. Wisniewski, Accessing 2,1-Borazaronaphthols: Self-Arylation of 1-Alkyl-2-aryl-3-bromo-2,1-borazaronaphthalenes. *J. Org. Chem.*, 2014, **79**, 8339–8347.
- [9] A.-M. L. Hogan, D. F. O'Shea, Carbolithiation of *o*-Amino-(*E*)-Stilbenes: Diastereoselective Electrophile Substitution with Applications to Quinoline Synthesis. *J. Org. Chem.*, 2007, **72**, 9557–9571.

## 8. NMR Spectra

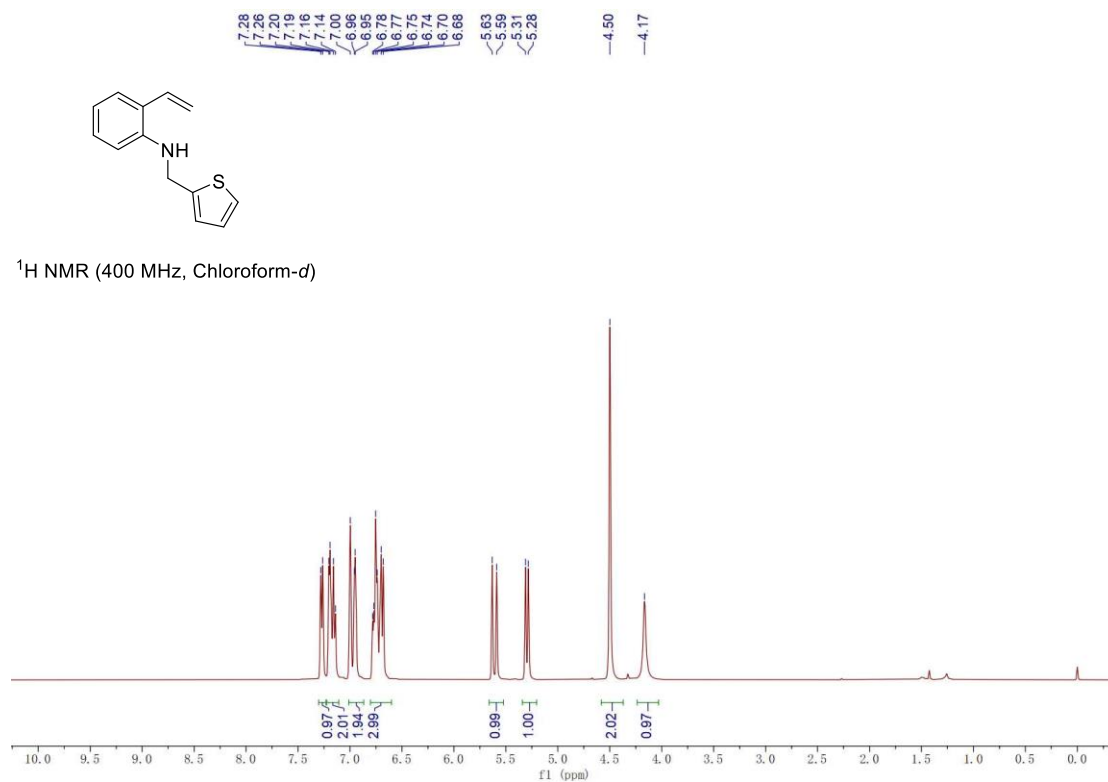

$^1\text{H}$  NMR spectrum of **1m**

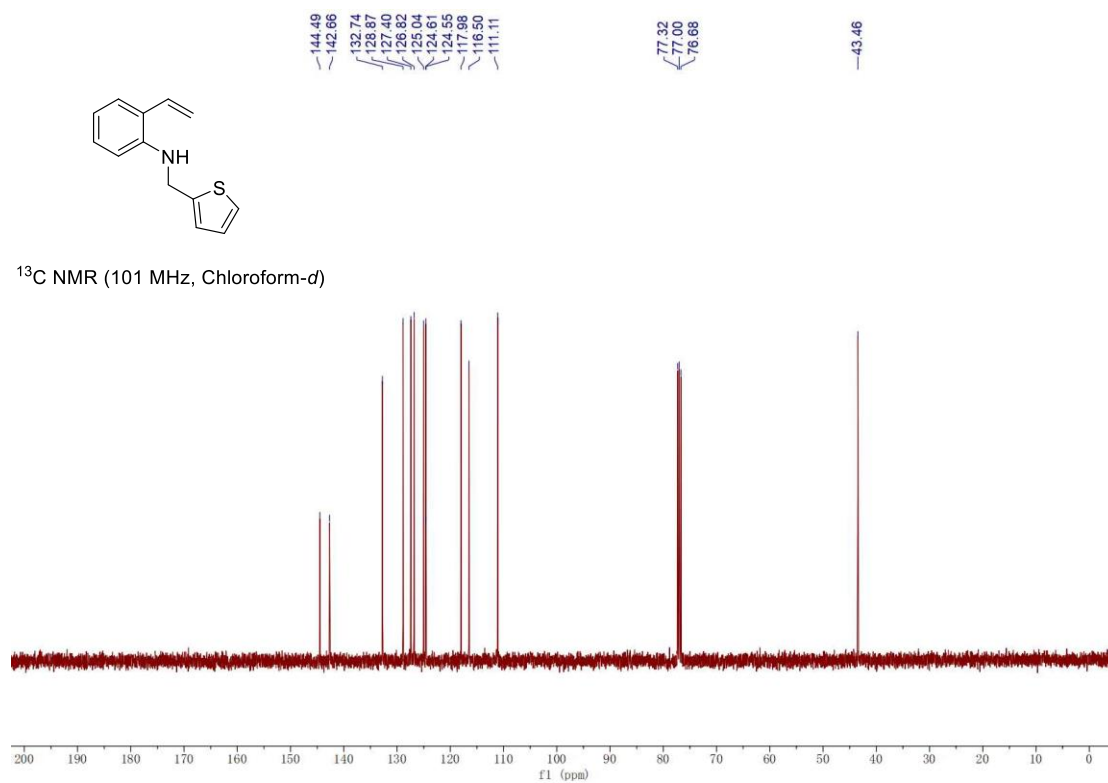

$^{13}\text{C}$  NMR spectrum of **1m**

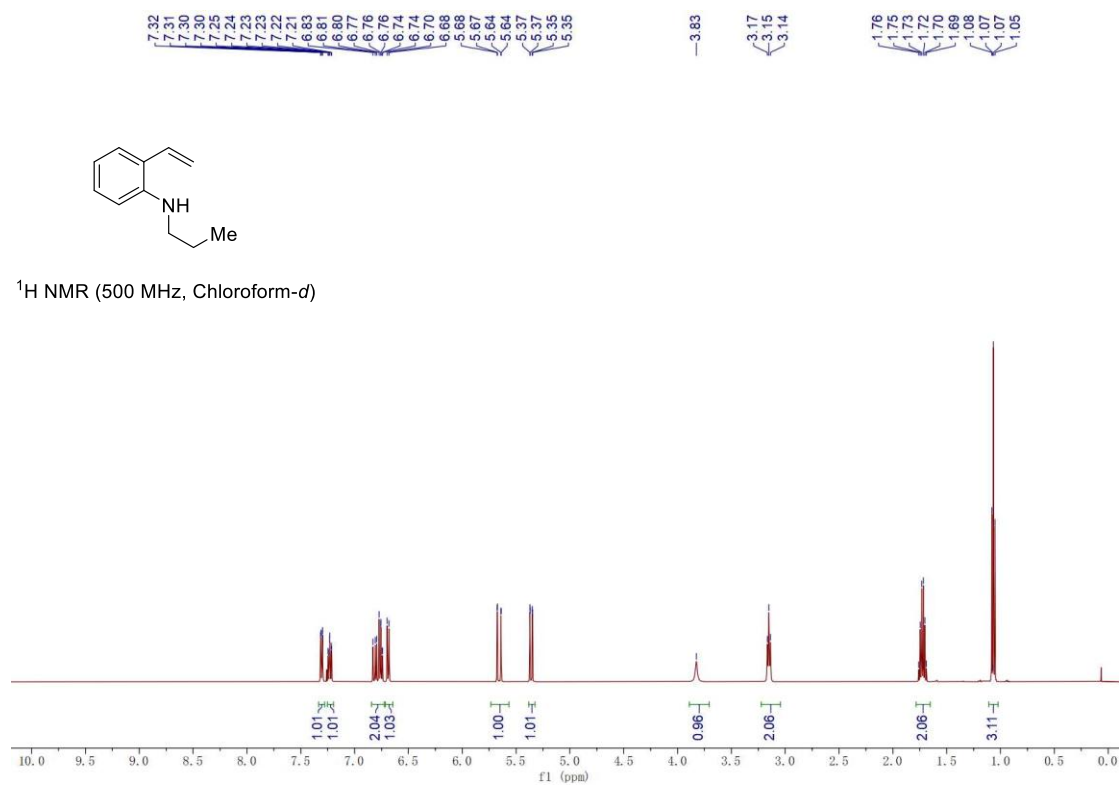

$^1\text{H}$  NMR spectrum of **1o**

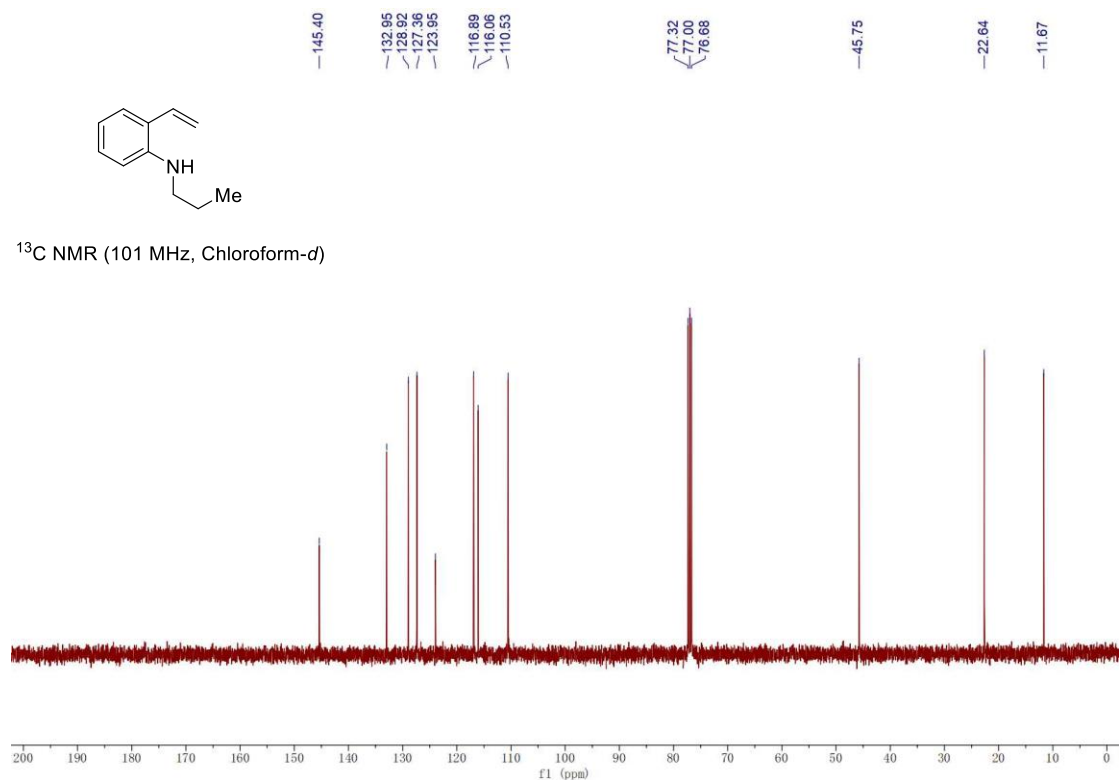

$^{13}\text{C}$  NMR spectrum of **1o**

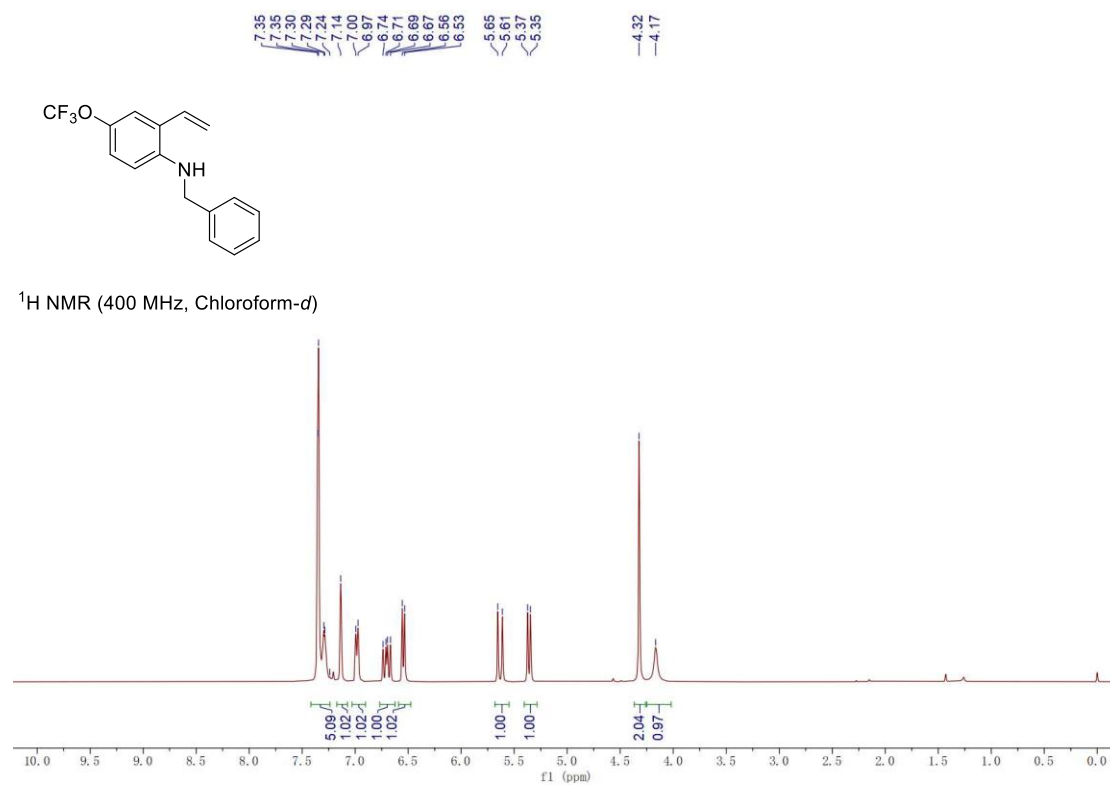

$^1\text{H}$  NMR spectrum of **1s**

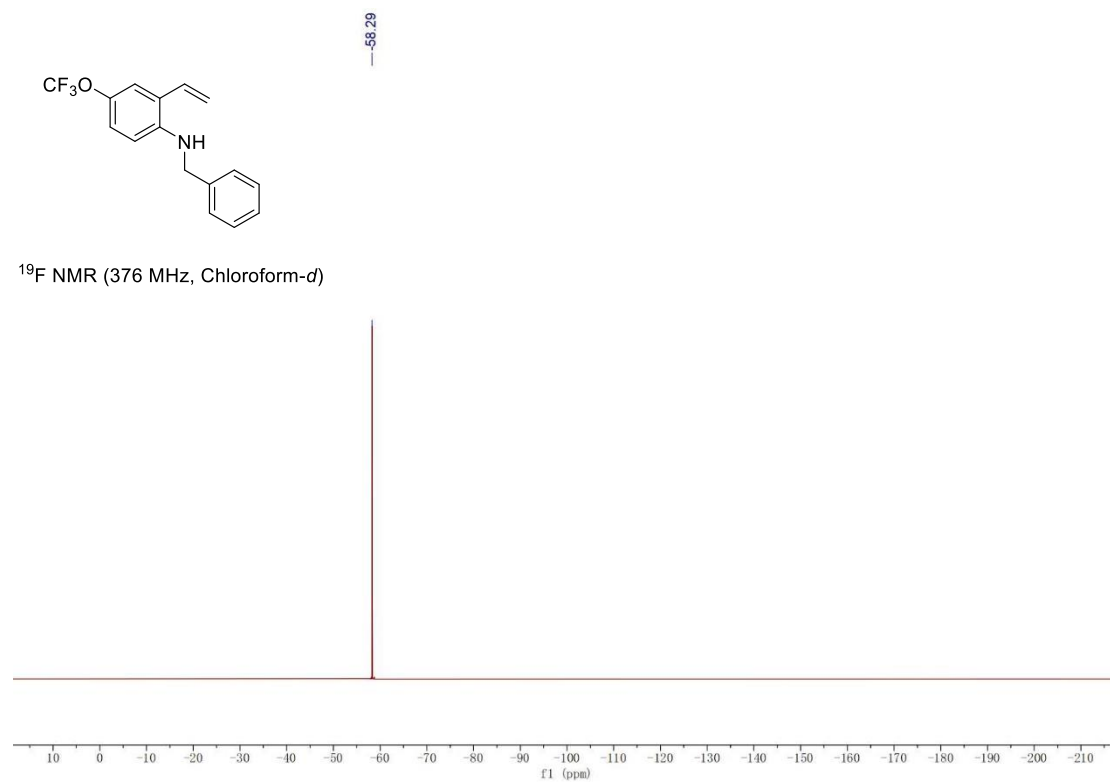

$^{19}\text{F}$  NMR spectrum of **1s**



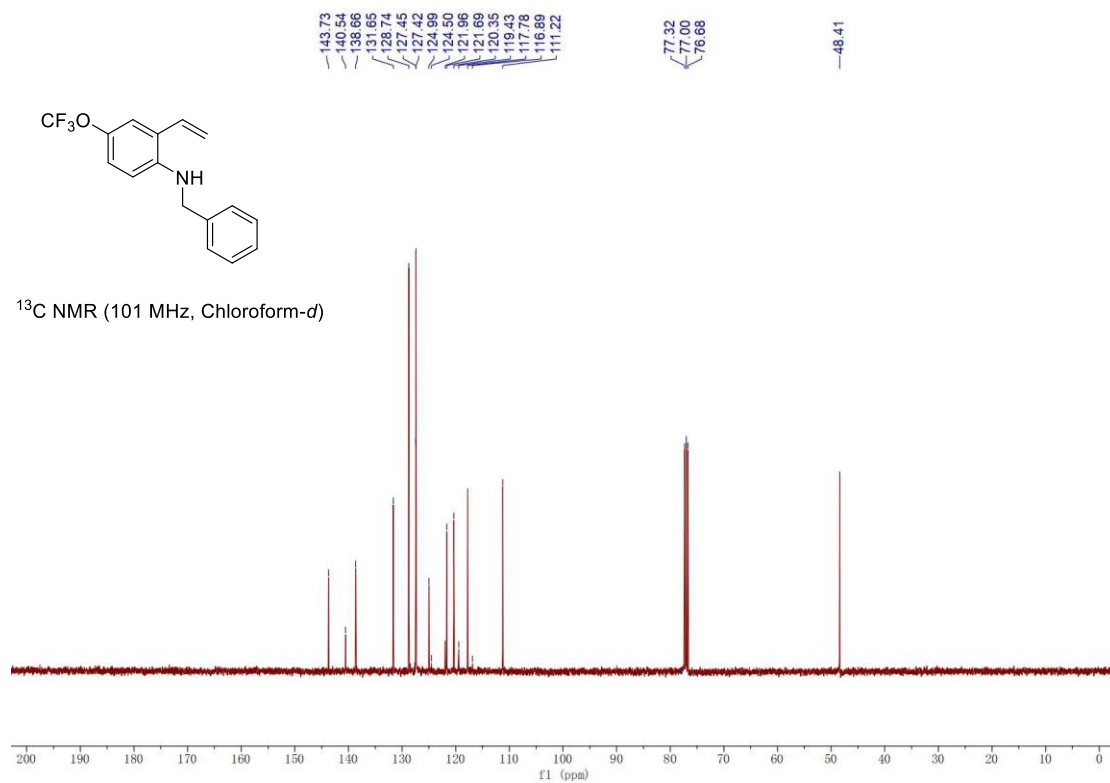

<sup>13</sup>C NMR spectrum of **1s**

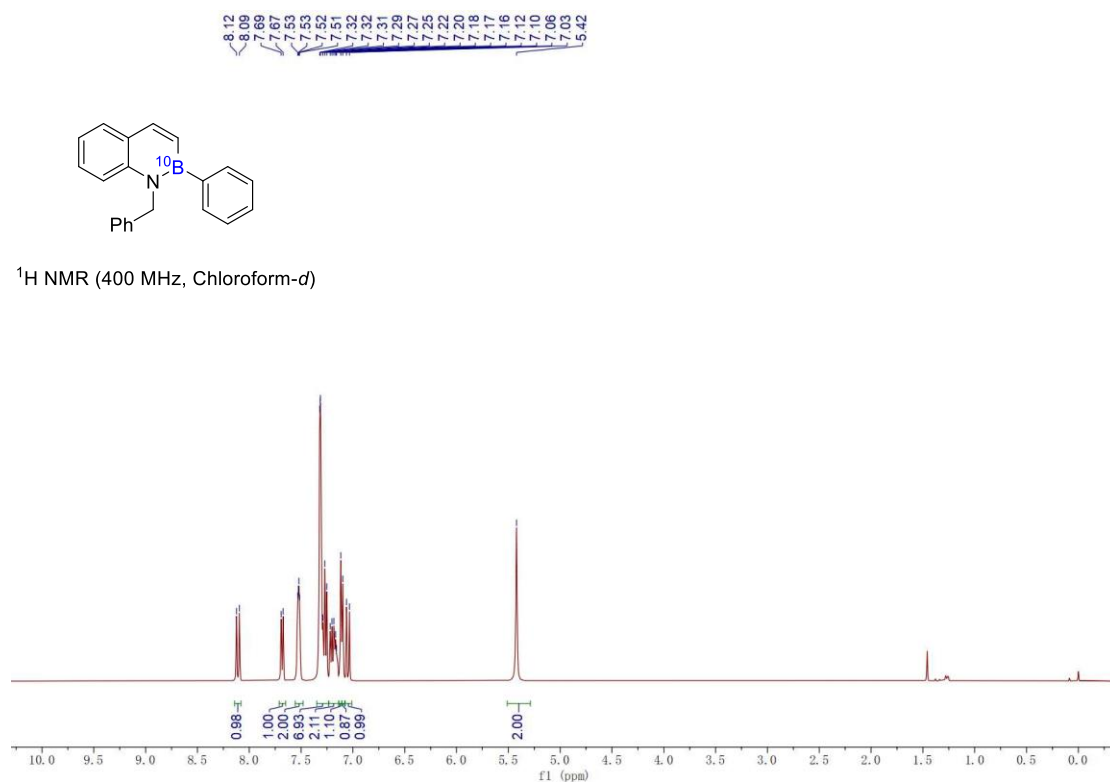

<sup>1</sup>H NMR spectrum of **3a**

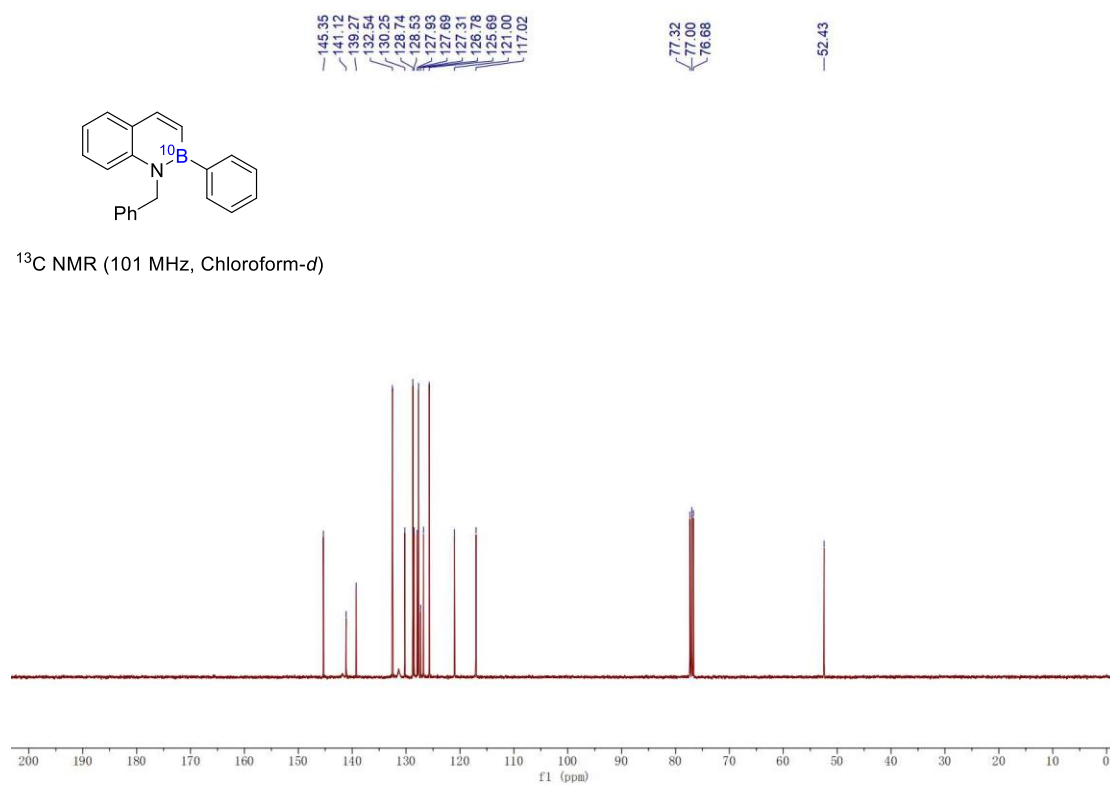

$^{13}\text{C}$  NMR spectrum of **3a**

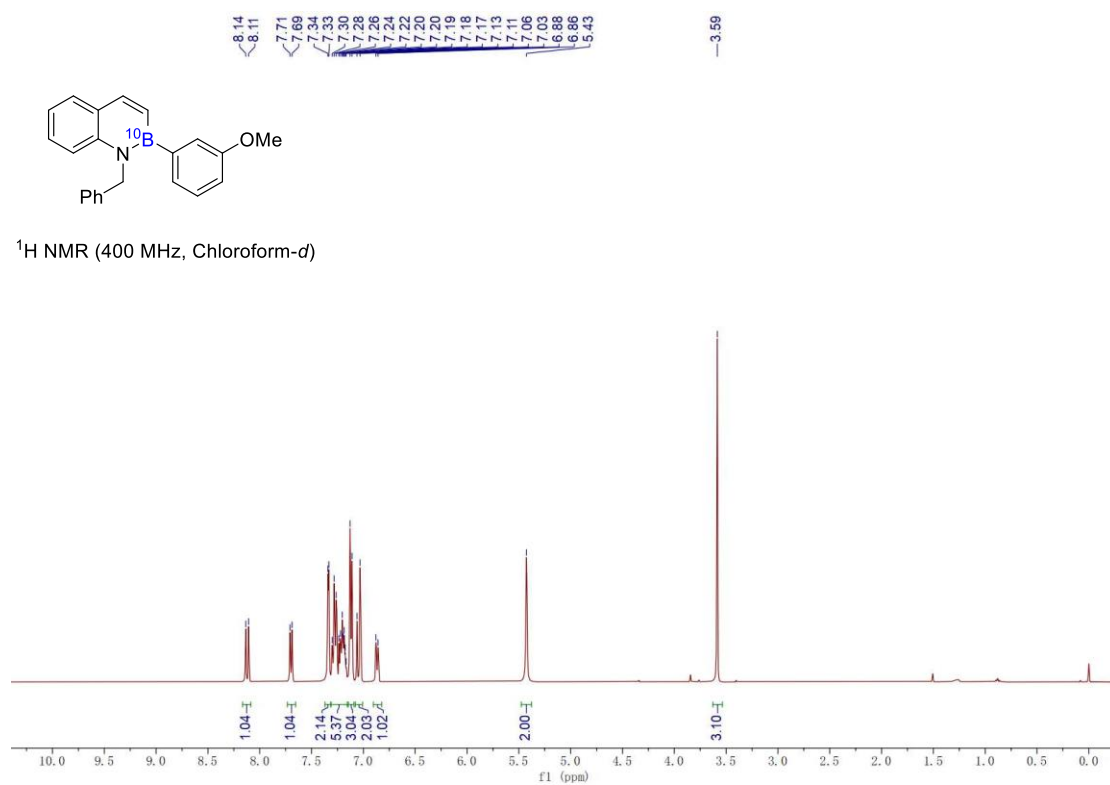

$^1\text{H}$  NMR spectrum of **3b**

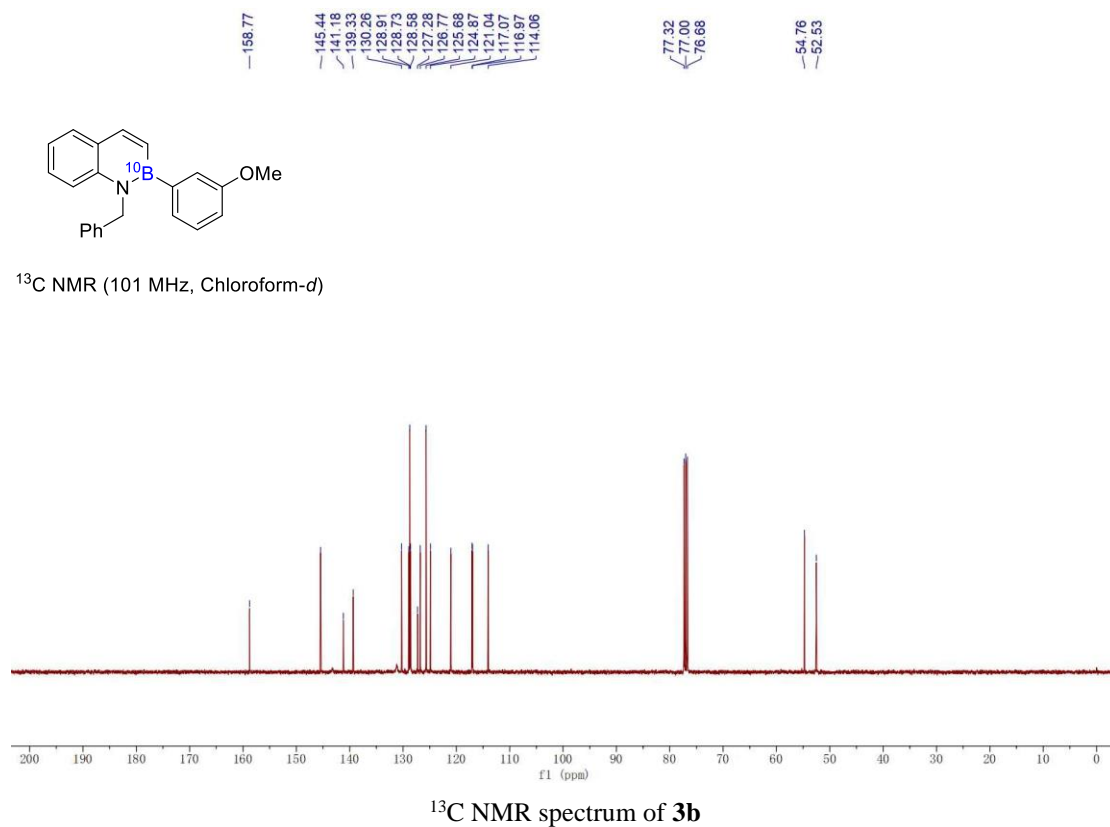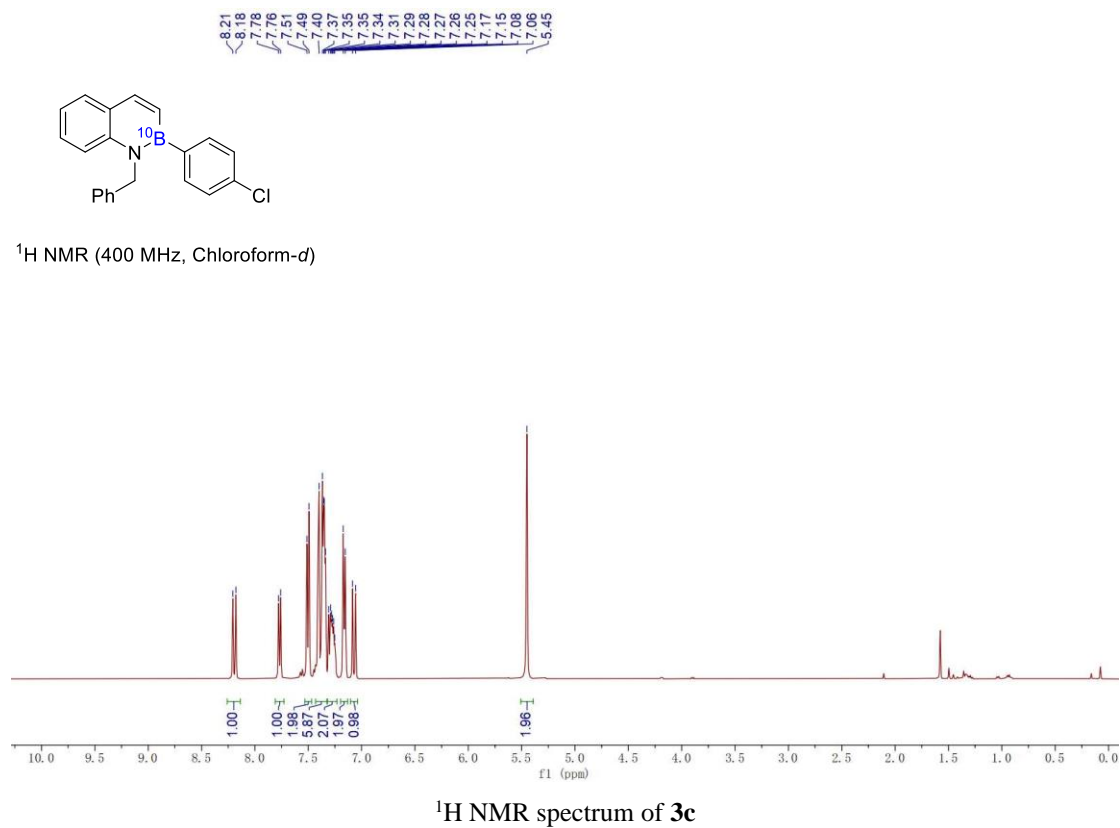

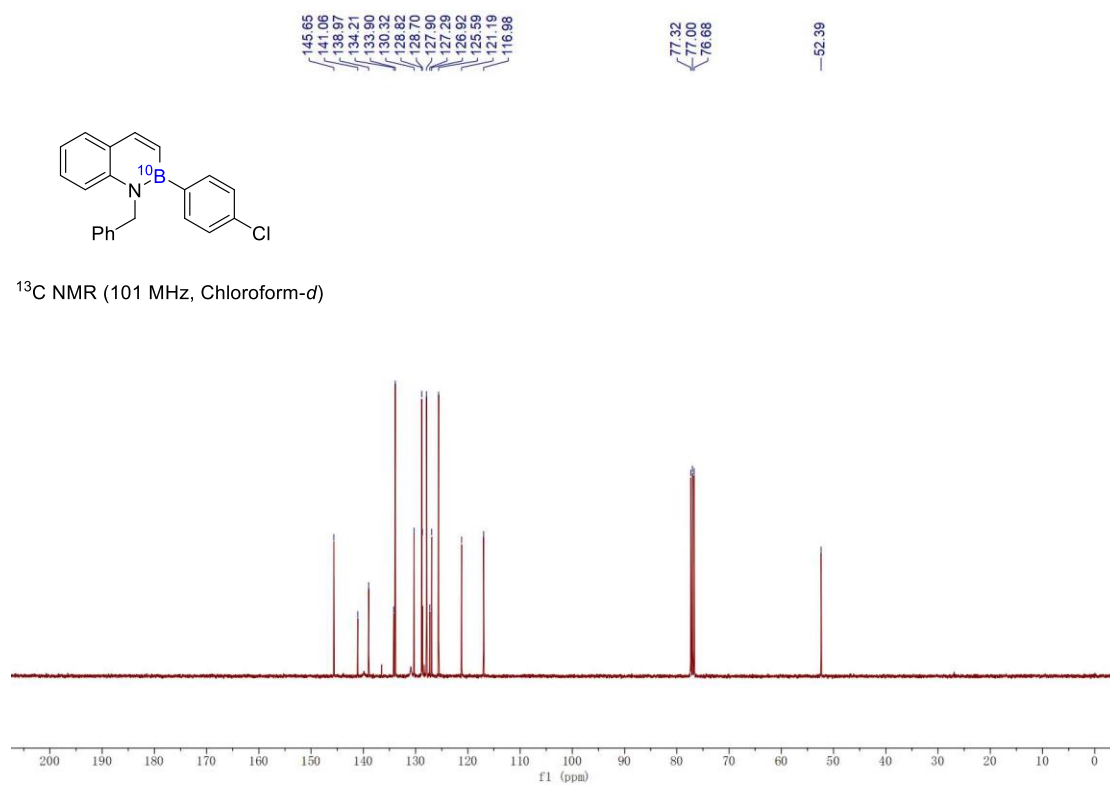

<sup>13</sup>C NMR spectrum of **3c**

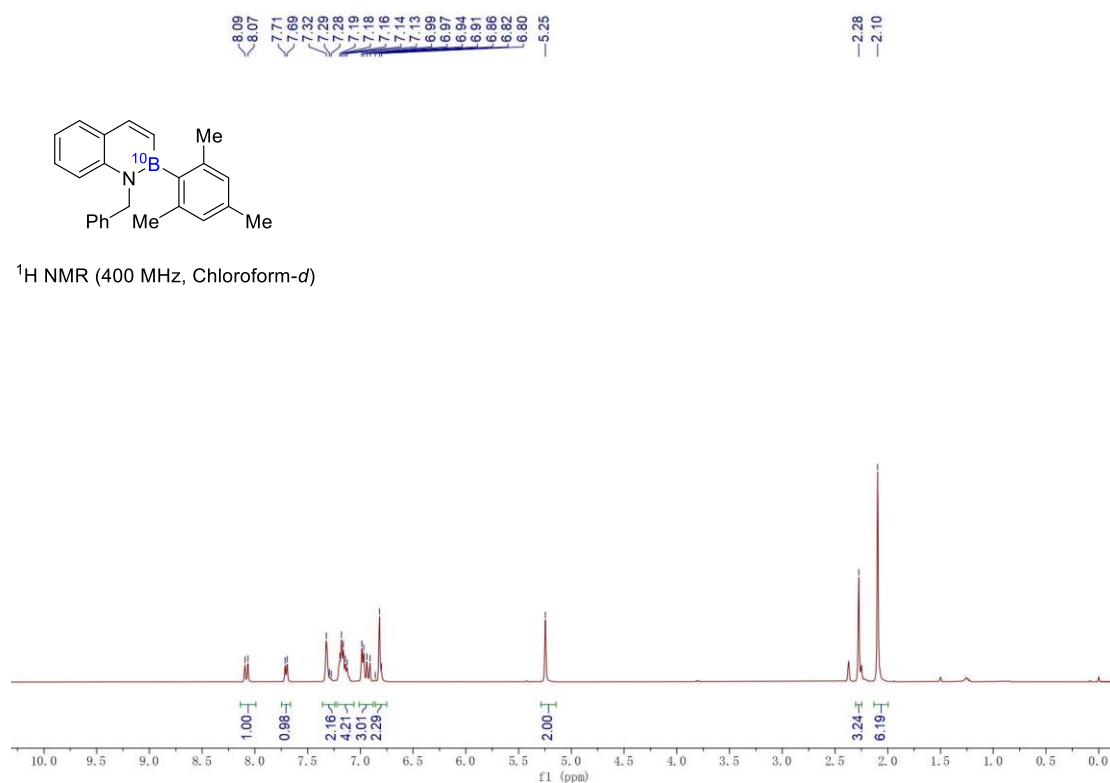

<sup>1</sup>H NMR spectrum of **3d**

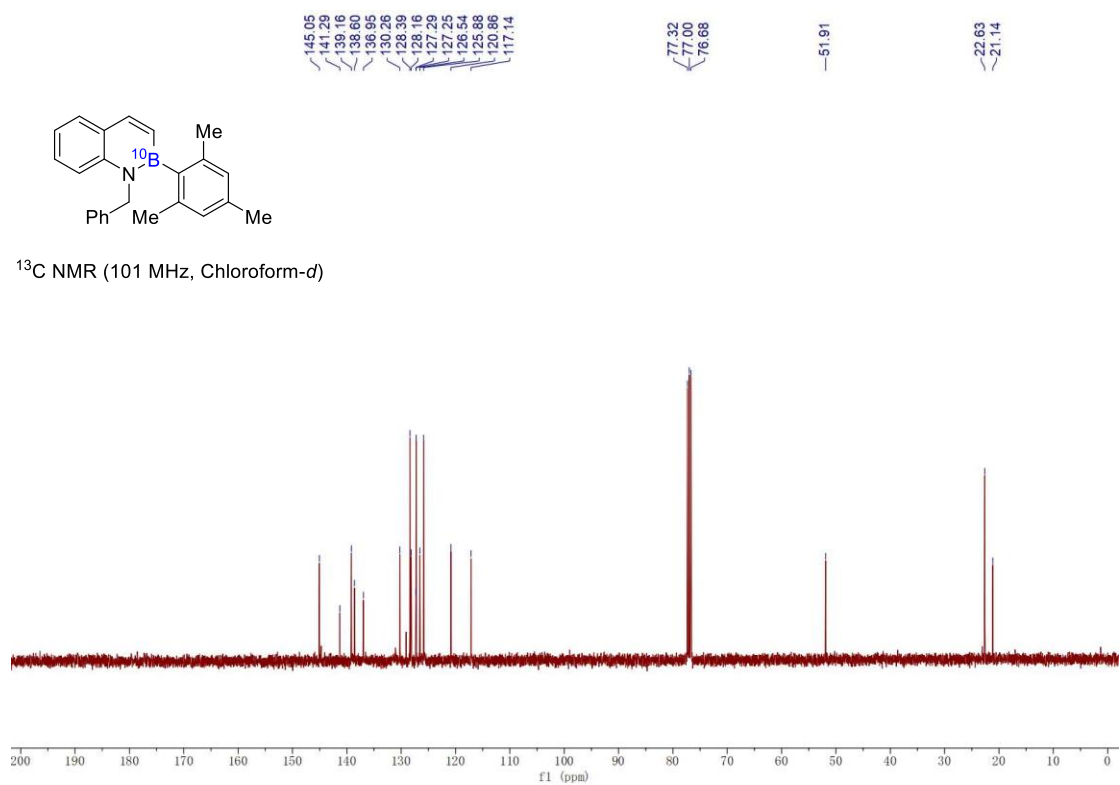

$^{13}\text{C}$  NMR spectrum of **3d**

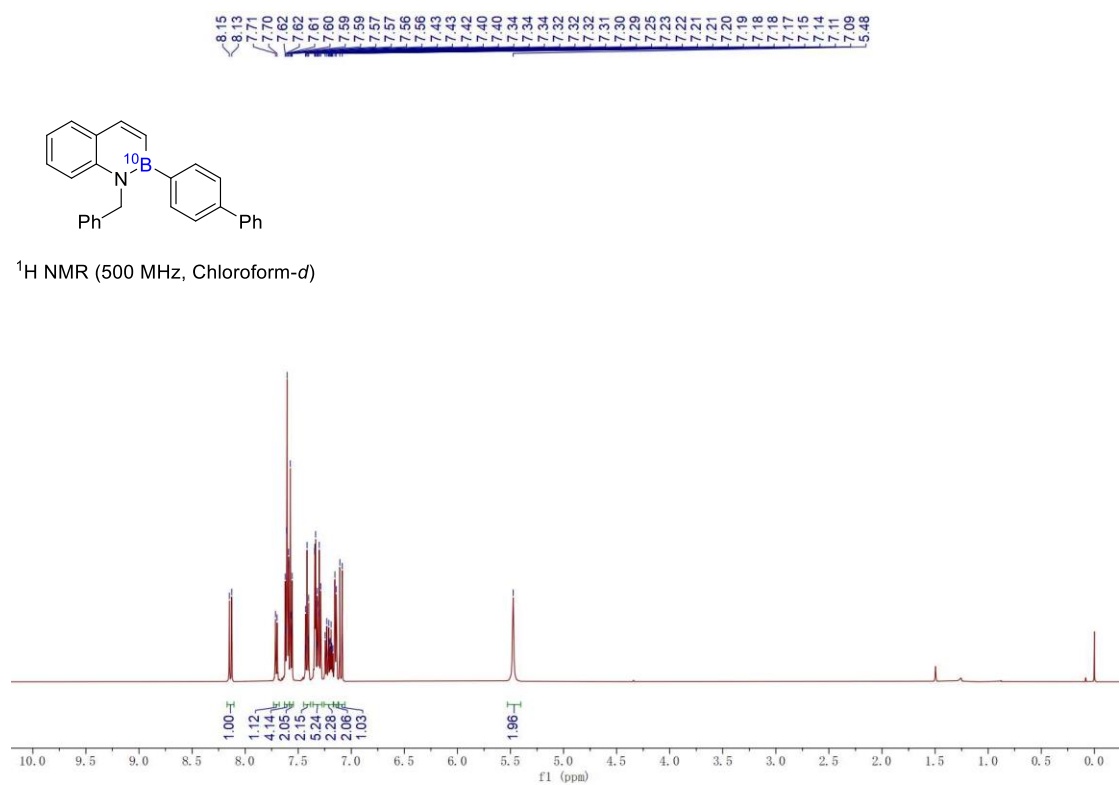

$^1\text{H}$  NMR spectrum of **3e**

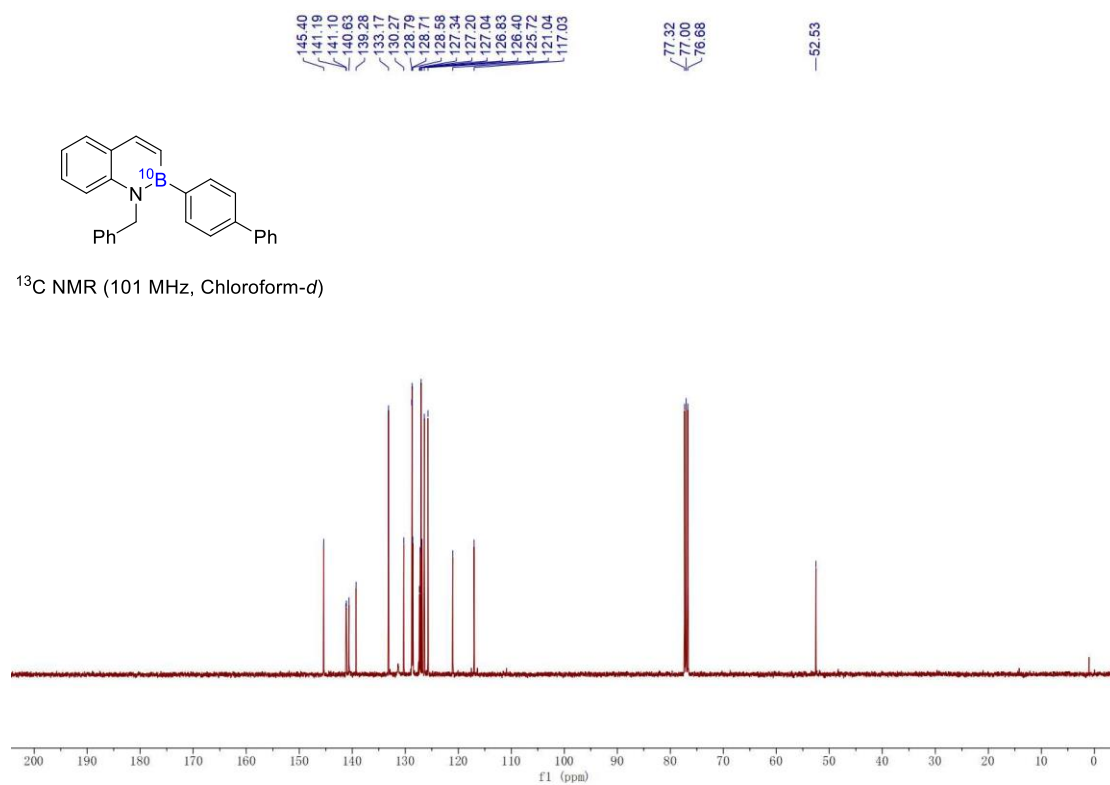

<sup>13</sup>C NMR spectrum of **3e**

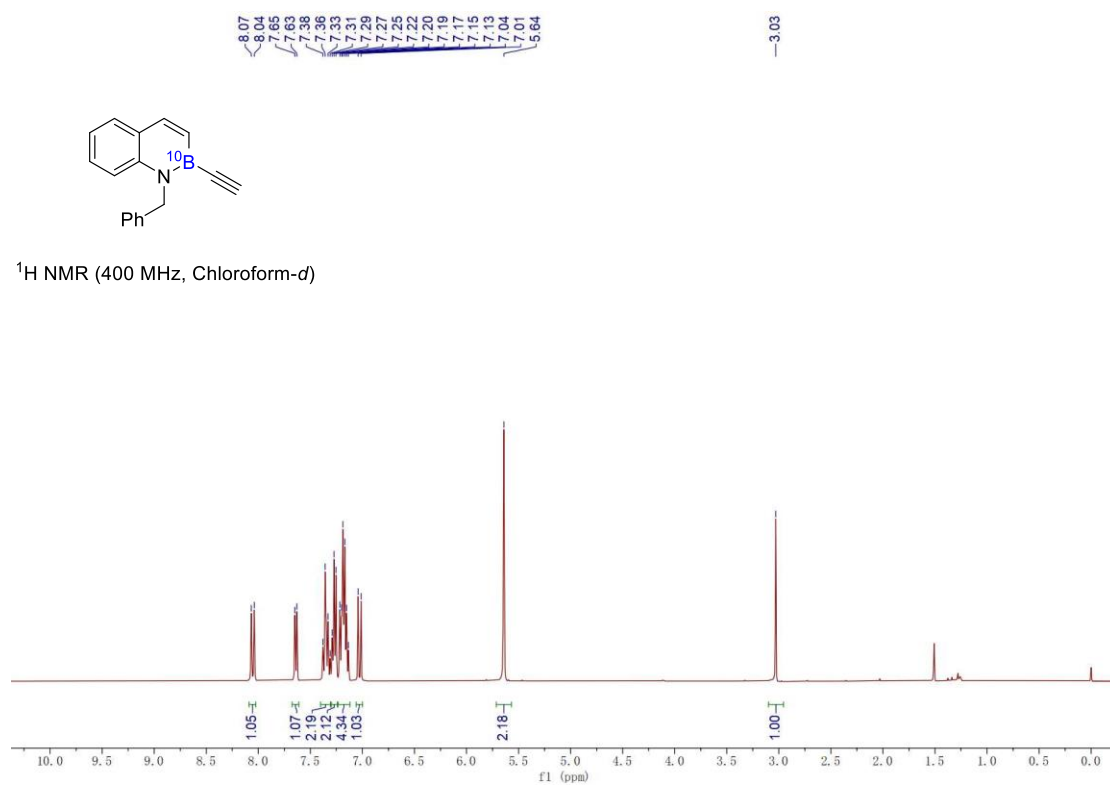

<sup>1</sup>H NMR spectrum of **3f**

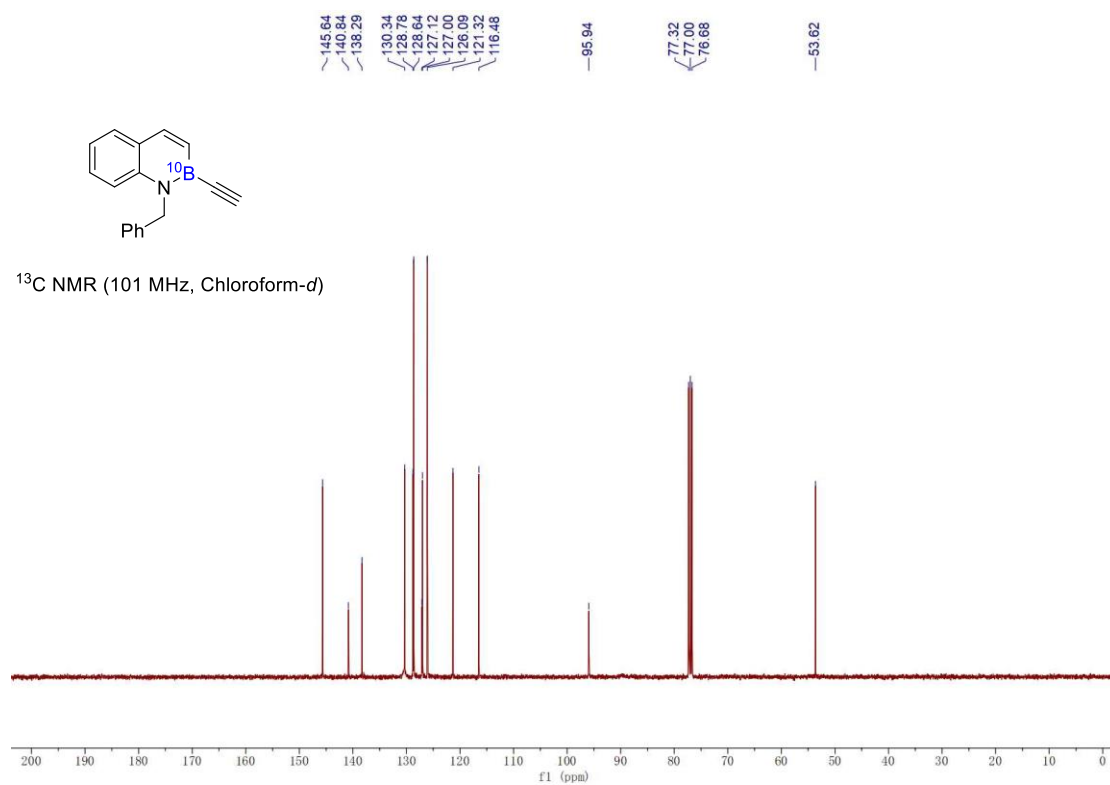

<sup>13</sup>C NMR spectrum of **3f**

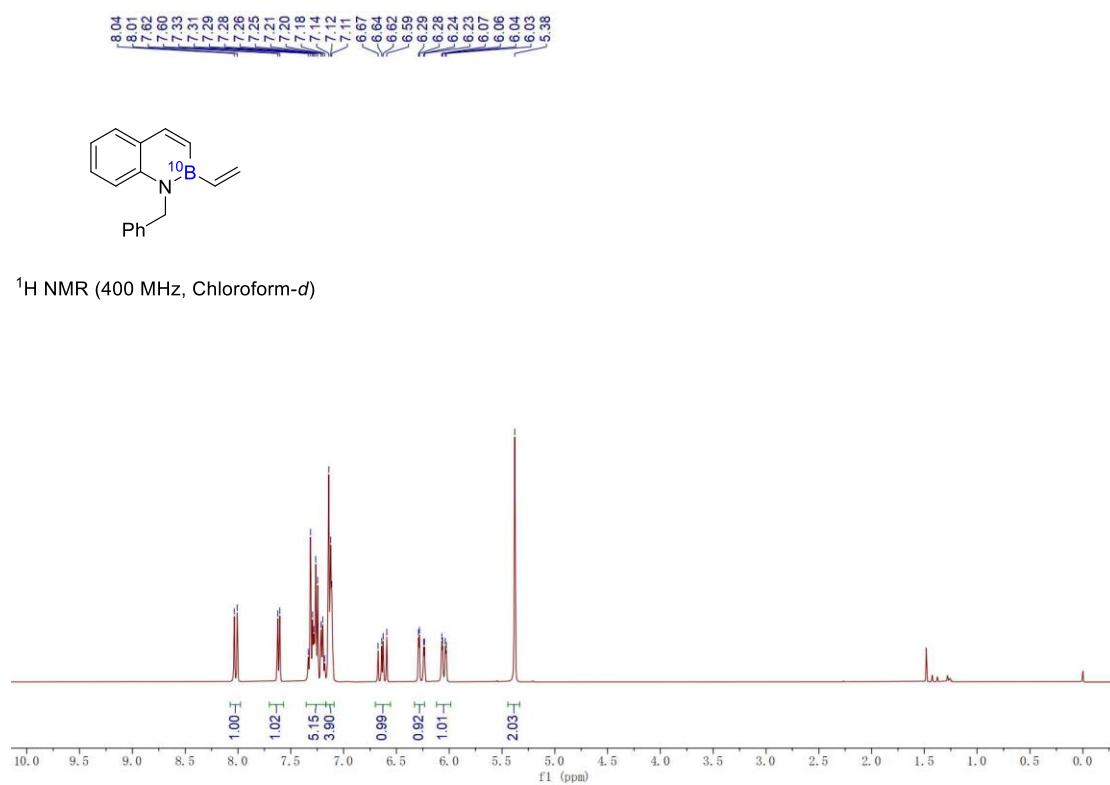

<sup>1</sup>H NMR spectrum of **3g**

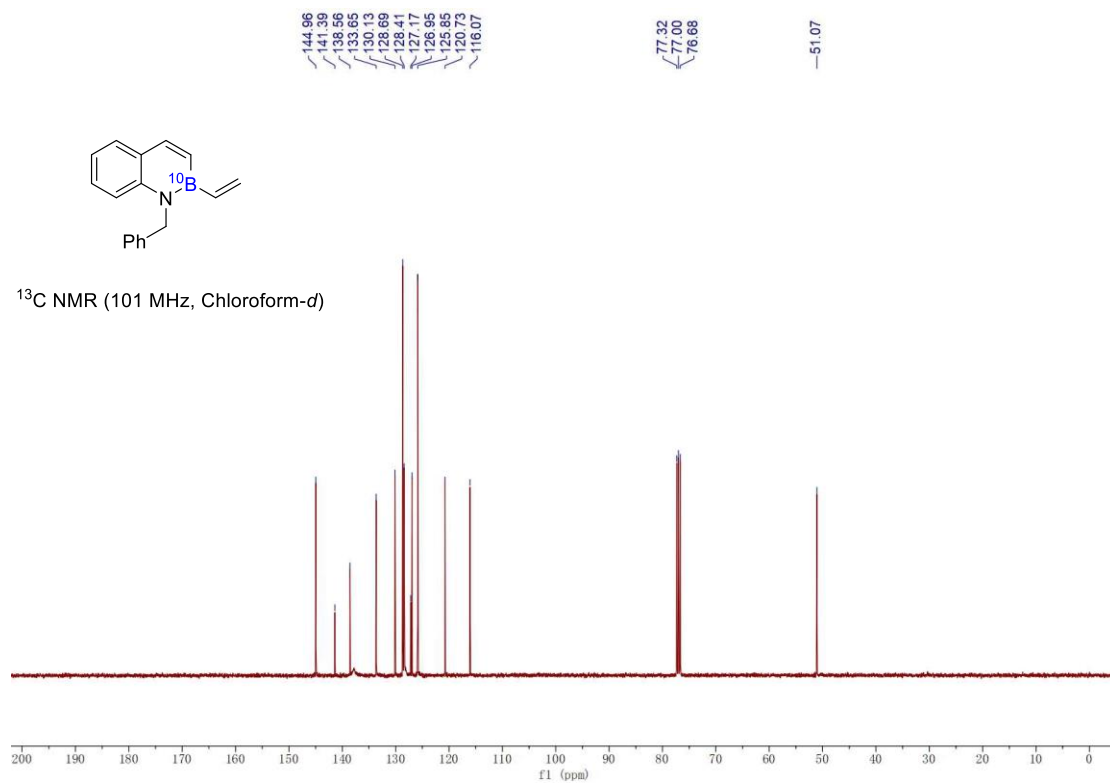

$^{13}\text{C}$  NMR spectrum of **3g**

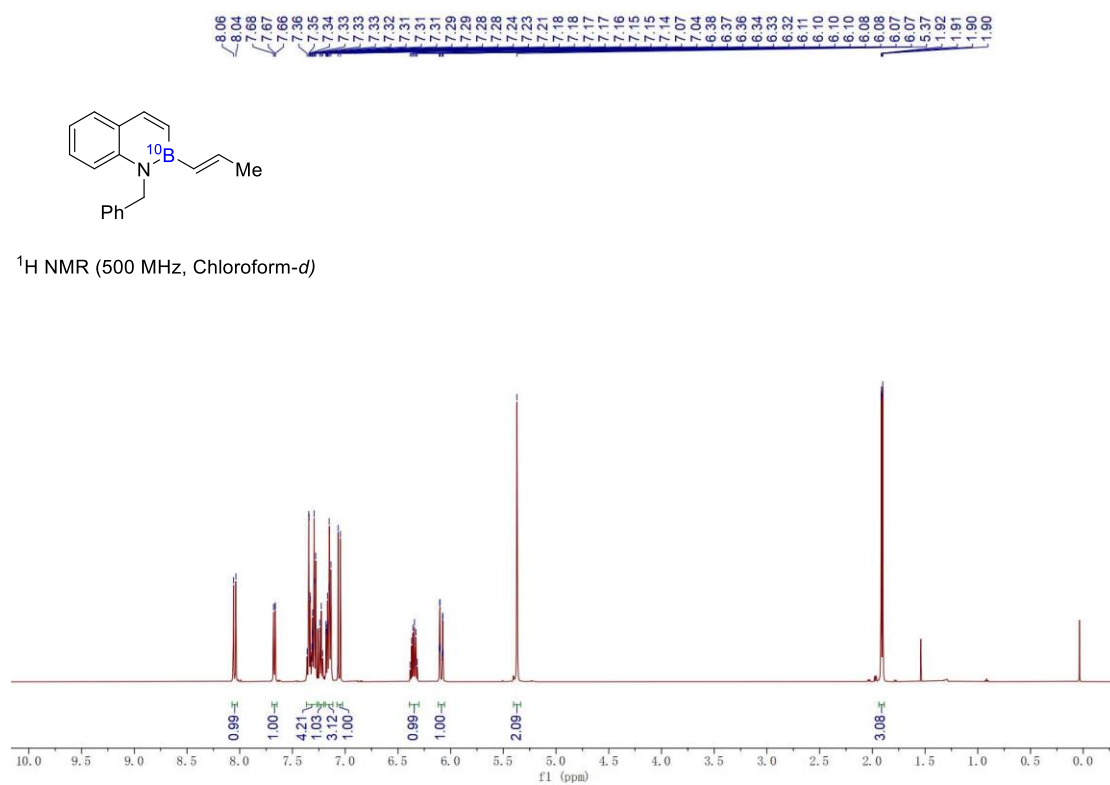

$^1\text{H}$  NMR spectrum of **3h**



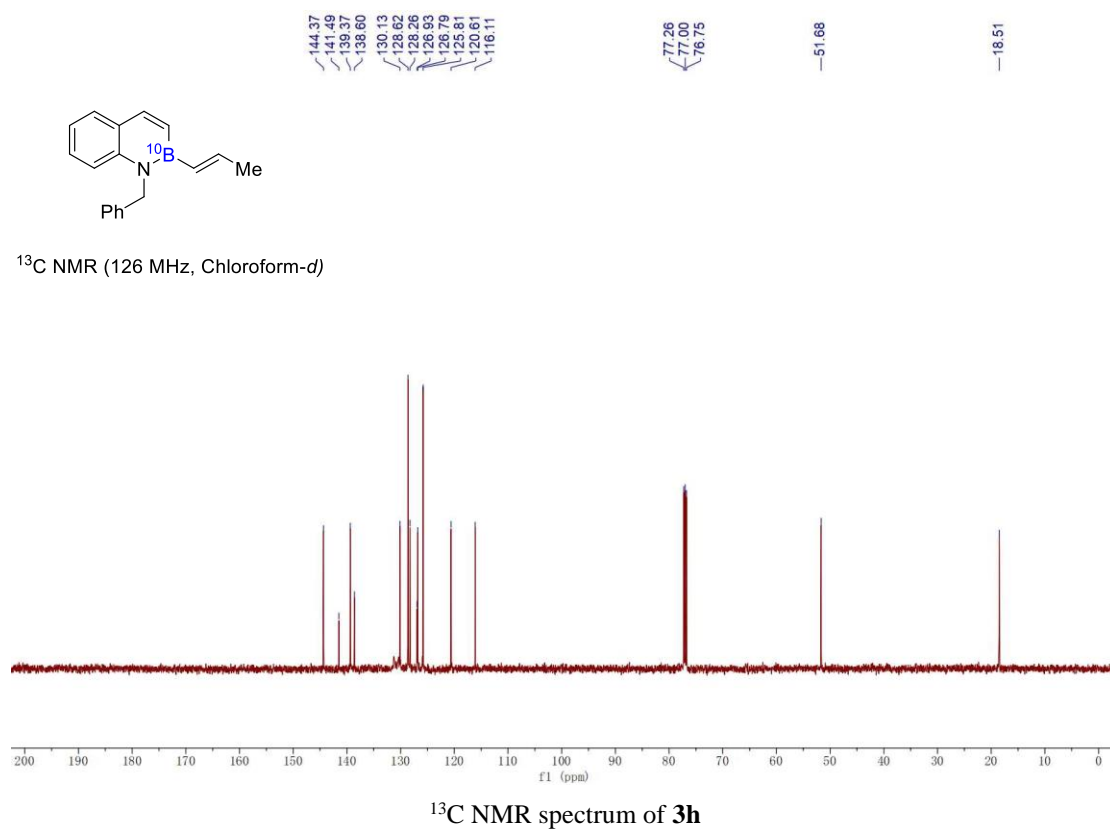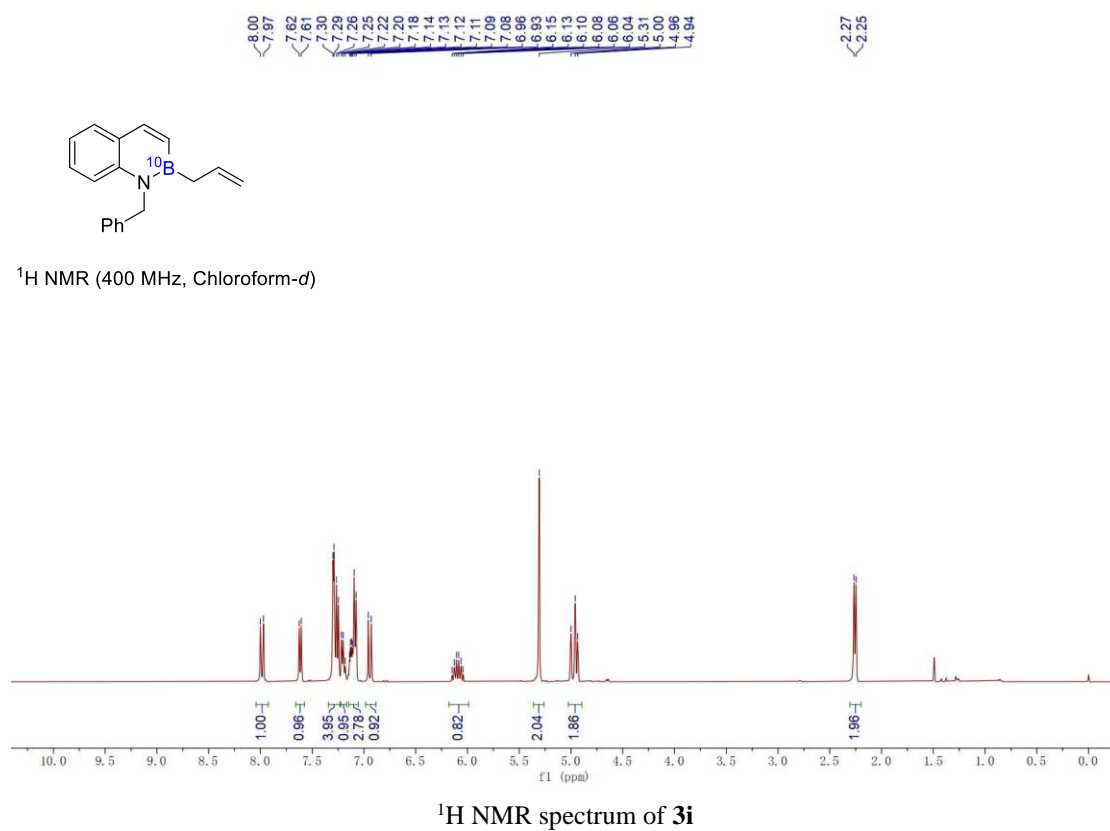

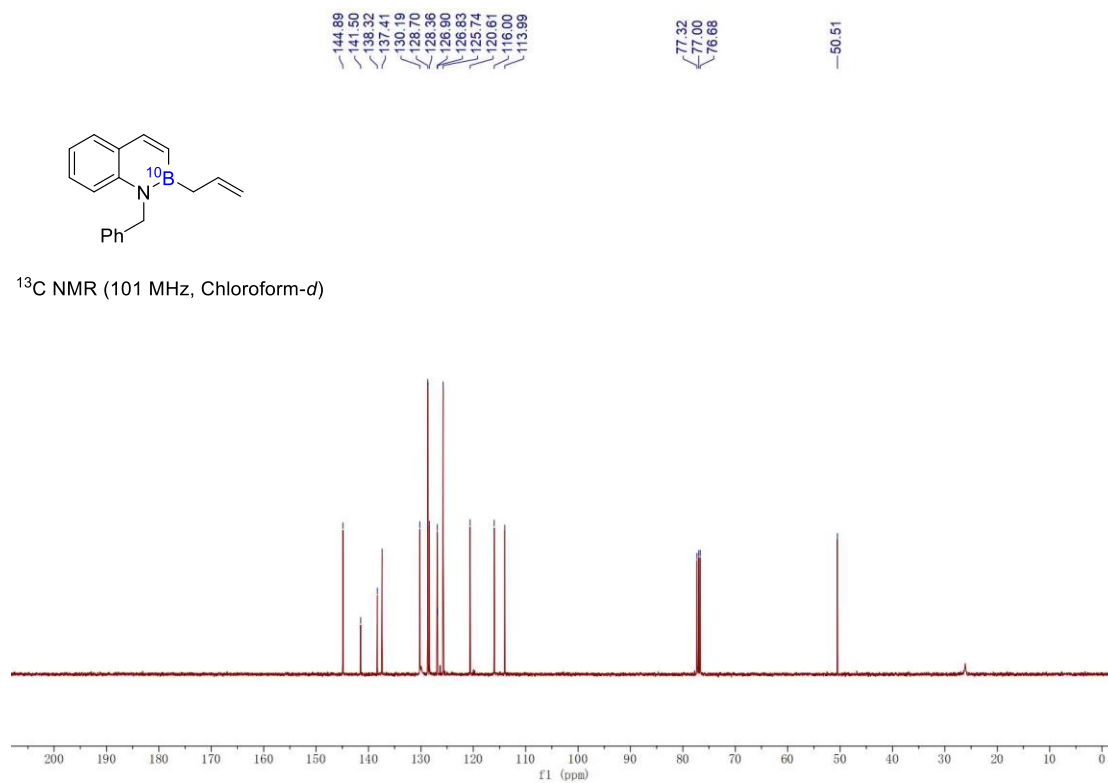

$^{13}\text{C}$  NMR spectrum of **3i**

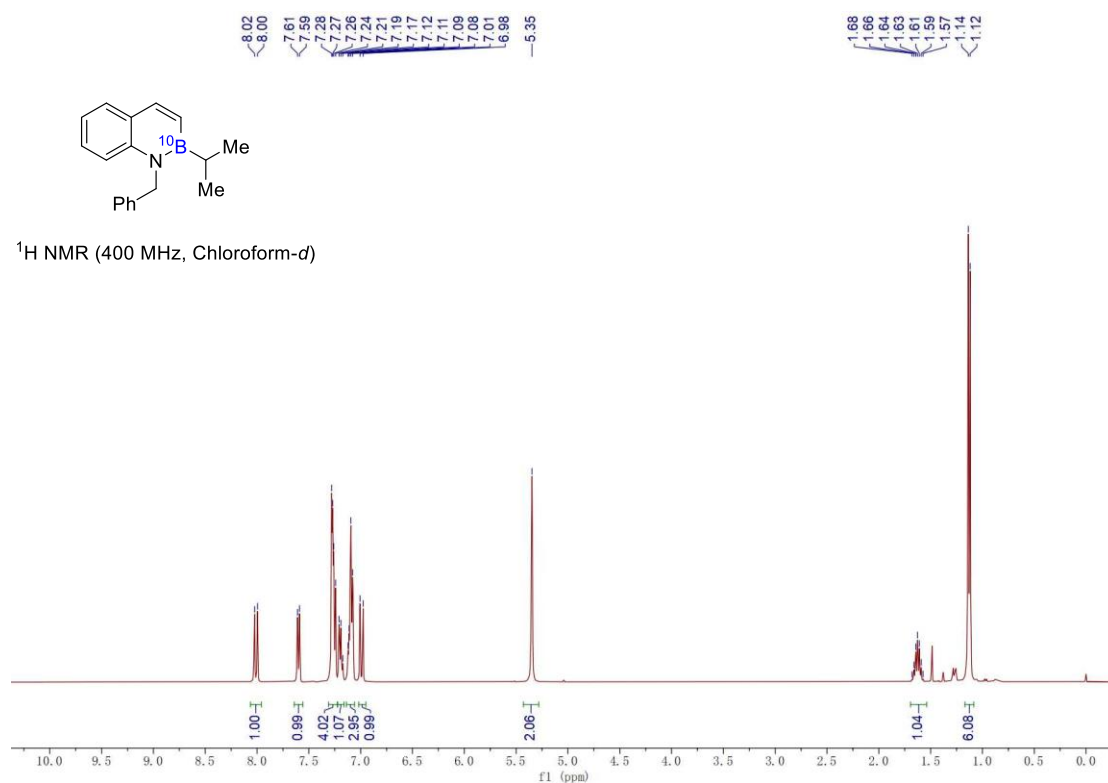

$^1\text{H}$  NMR spectrum of **3j**

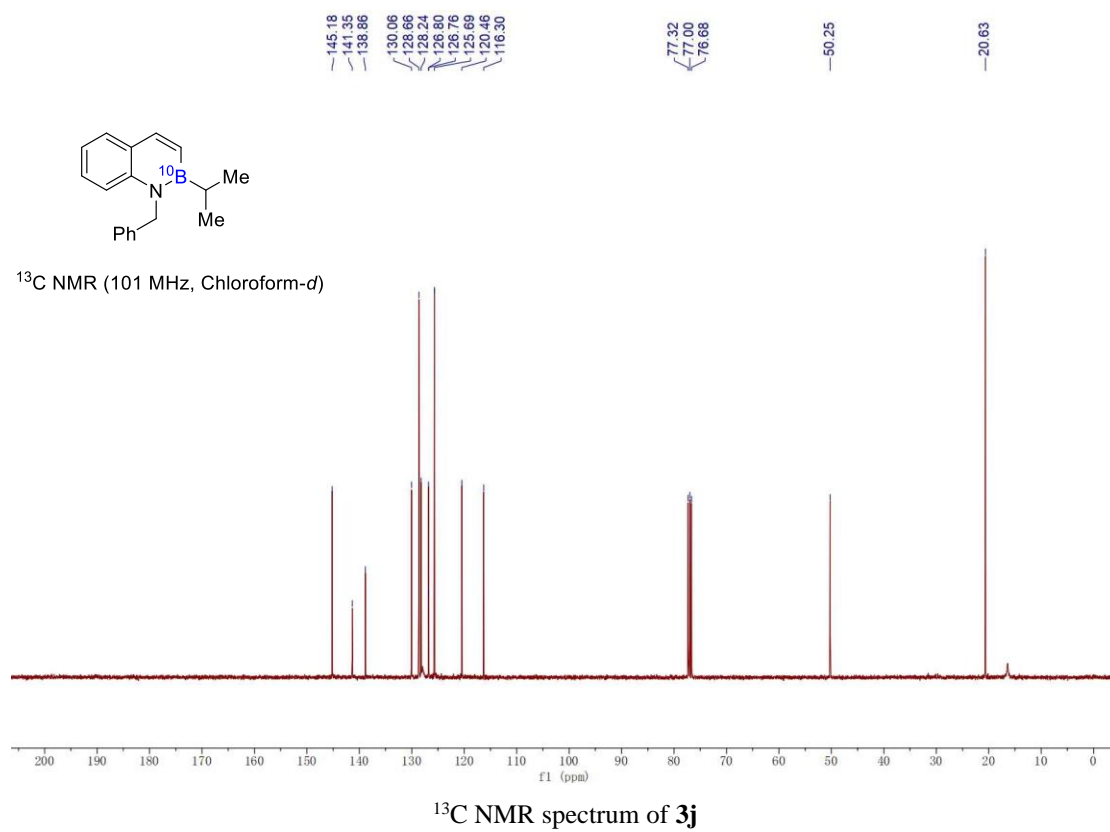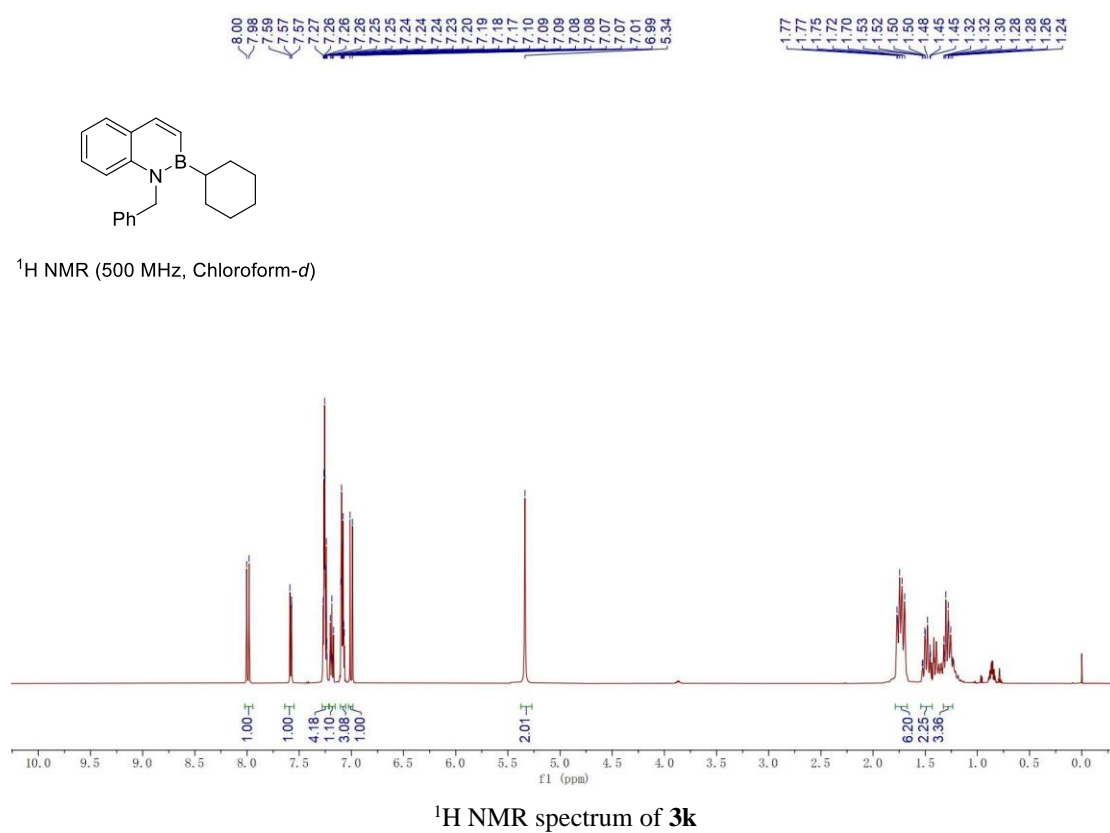

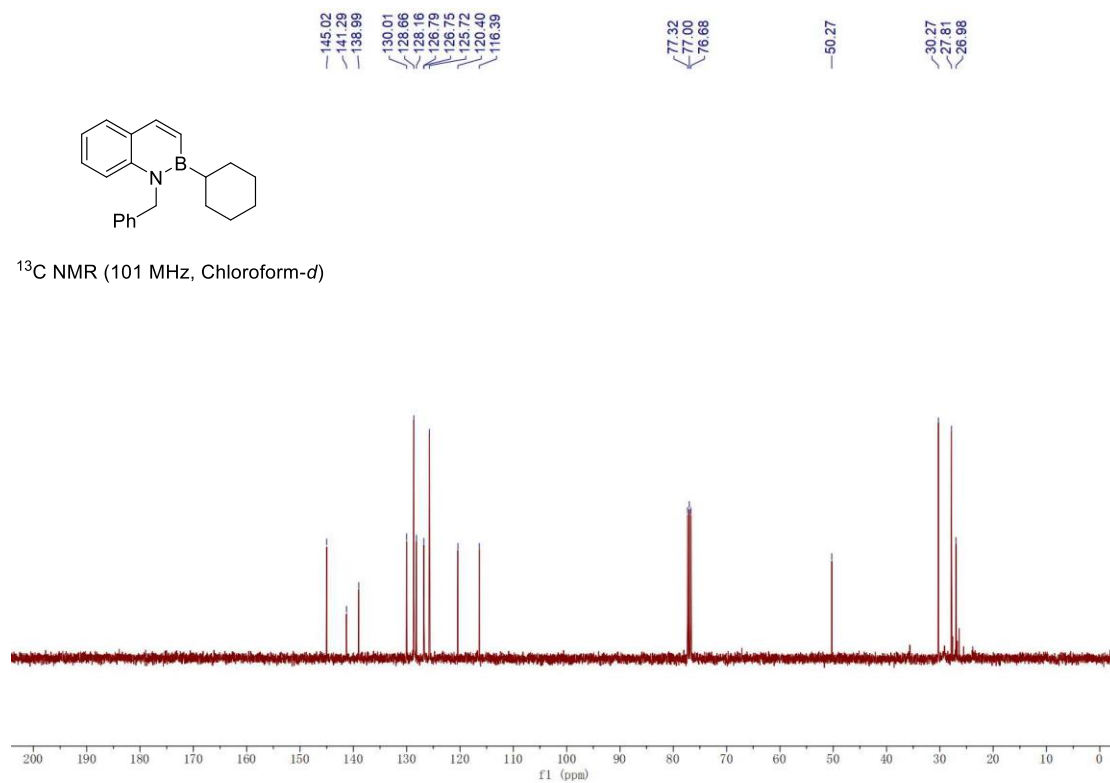

$^{13}\text{C}$  NMR spectrum of **3k**

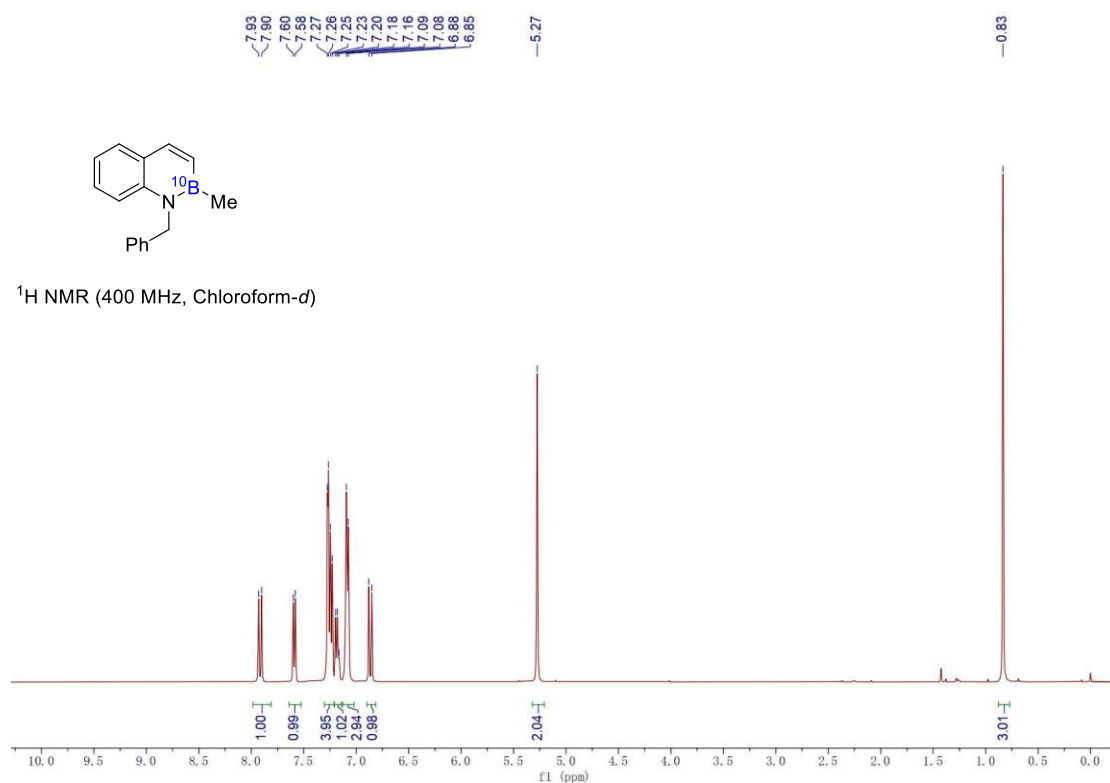

$^1\text{H}$  NMR spectrum of **3l**

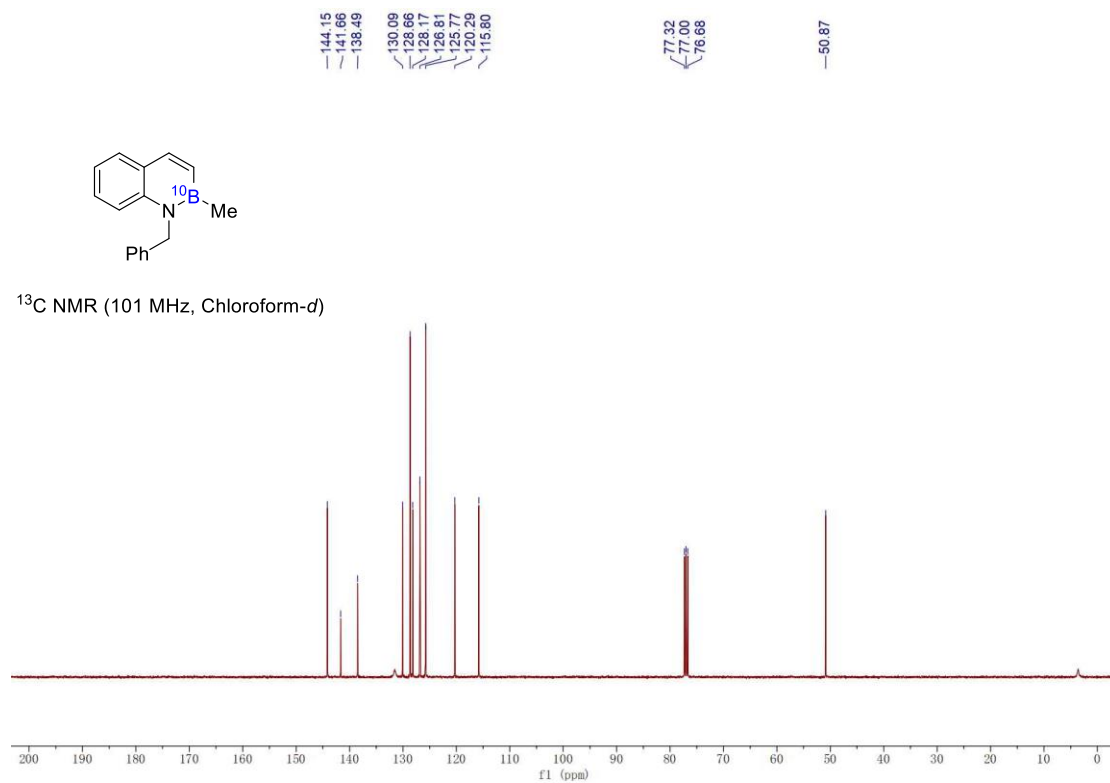

$^{13}\text{C}$  NMR spectrum of **31**

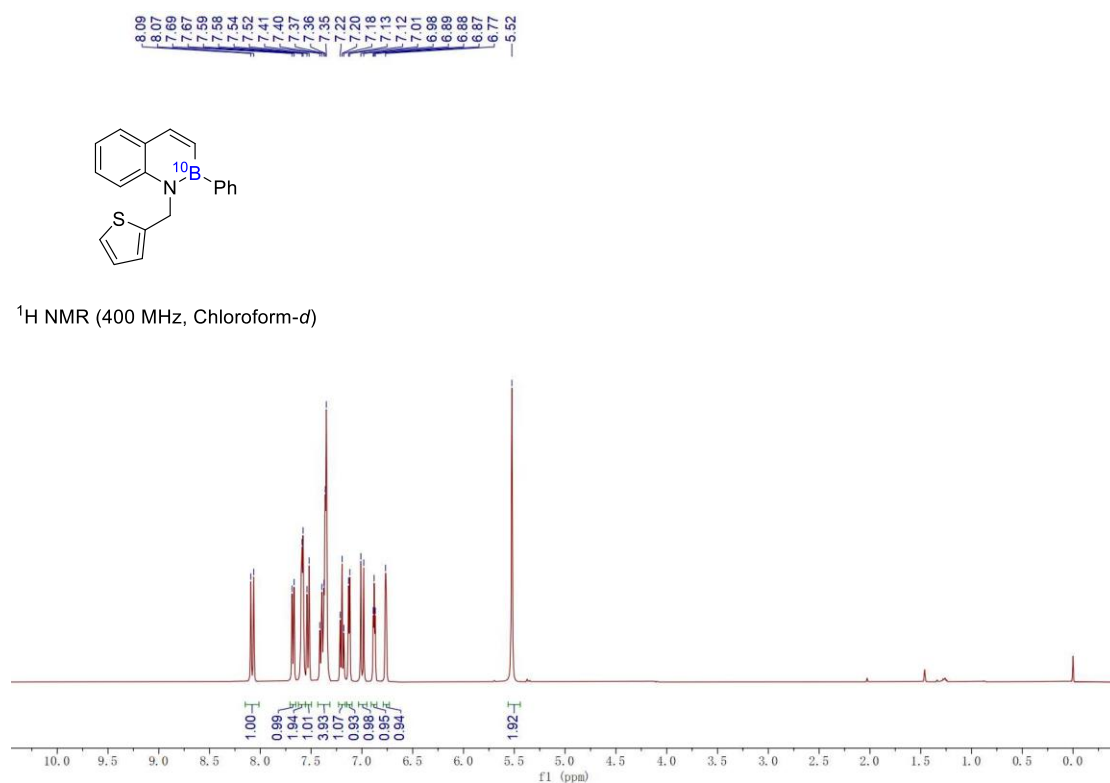

$^1\text{H}$  NMR spectrum of **3m**

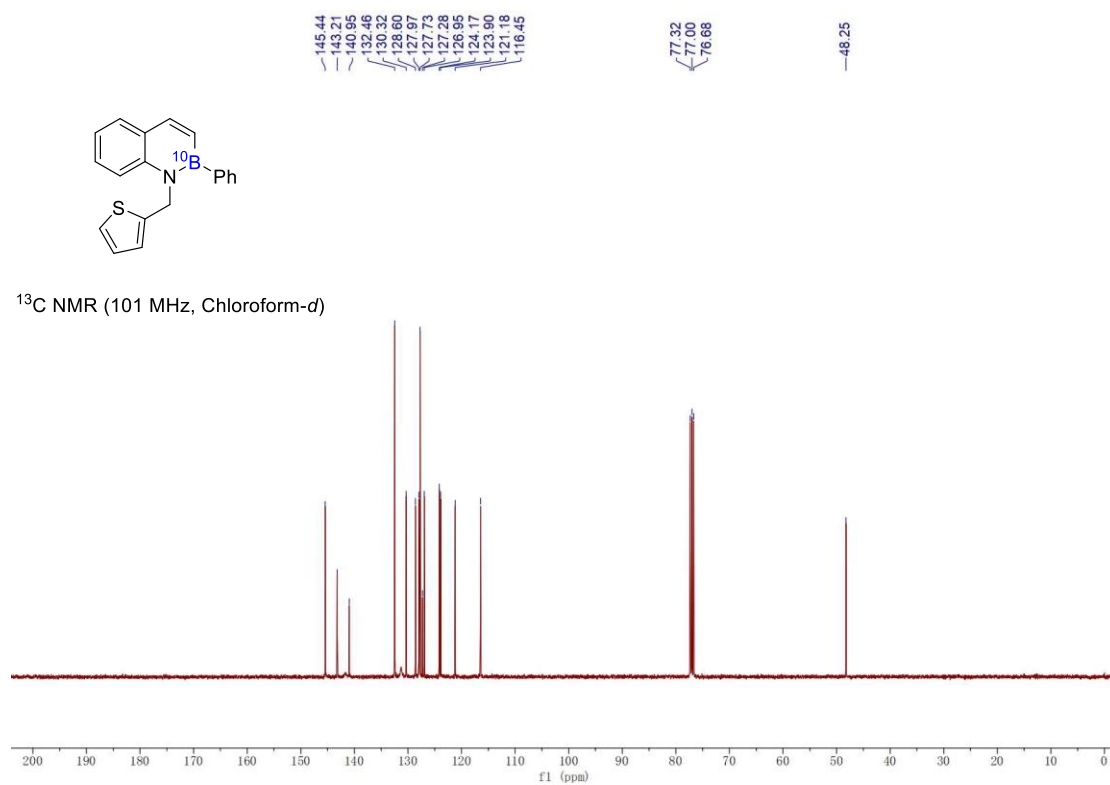

$^{13}\text{C}$  NMR spectrum of **3m**

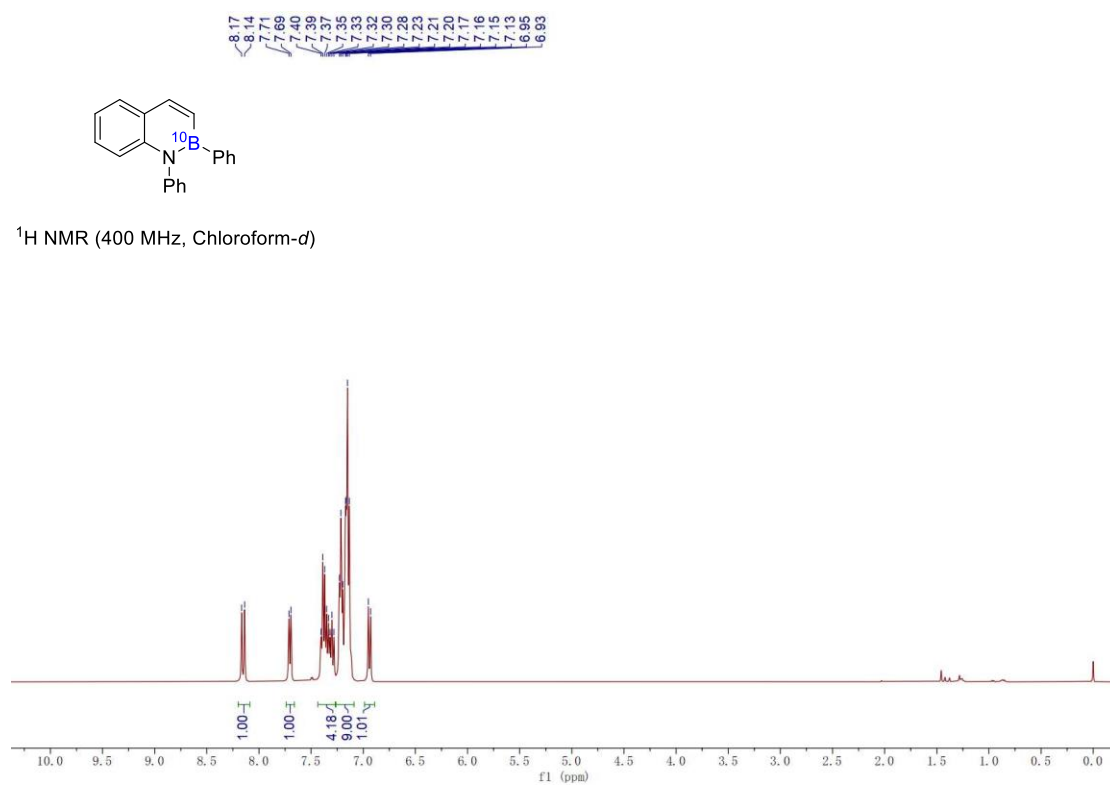

$^1\text{H}$  NMR spectrum of **3n**

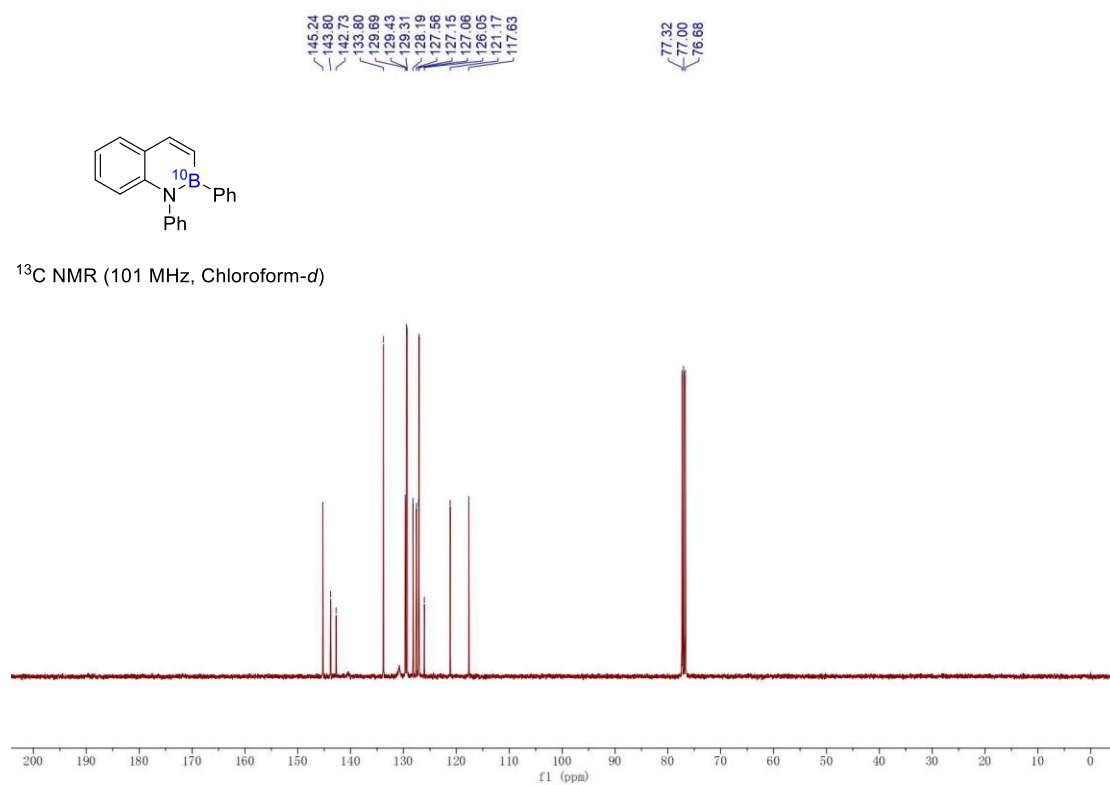

<sup>13</sup>C NMR spectrum of **3n**

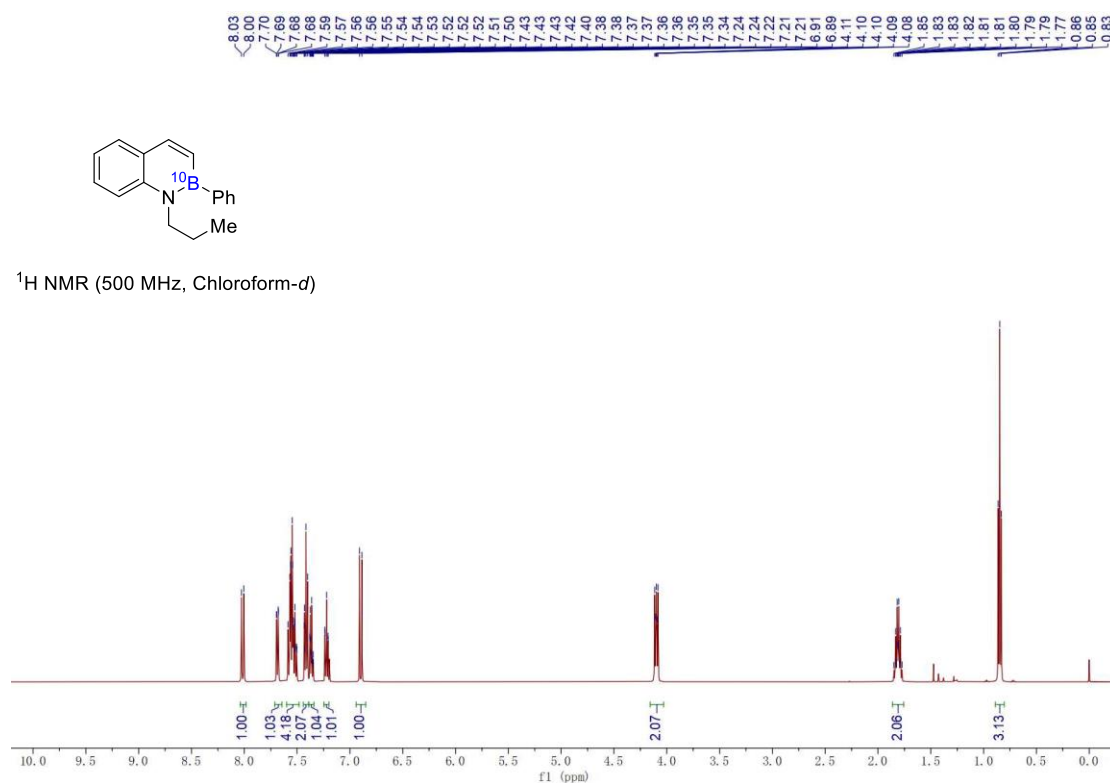

<sup>1</sup>H NMR spectrum of **3o**

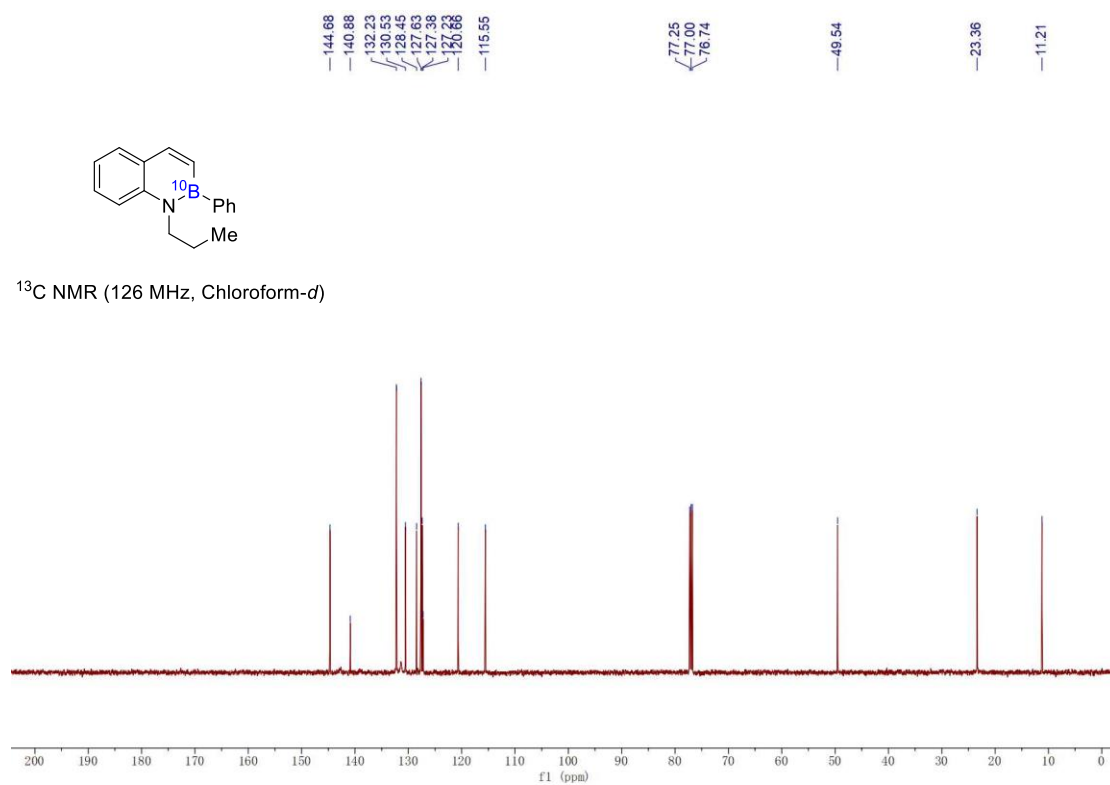

$^{13}\text{C}$  NMR spectrum of **30**

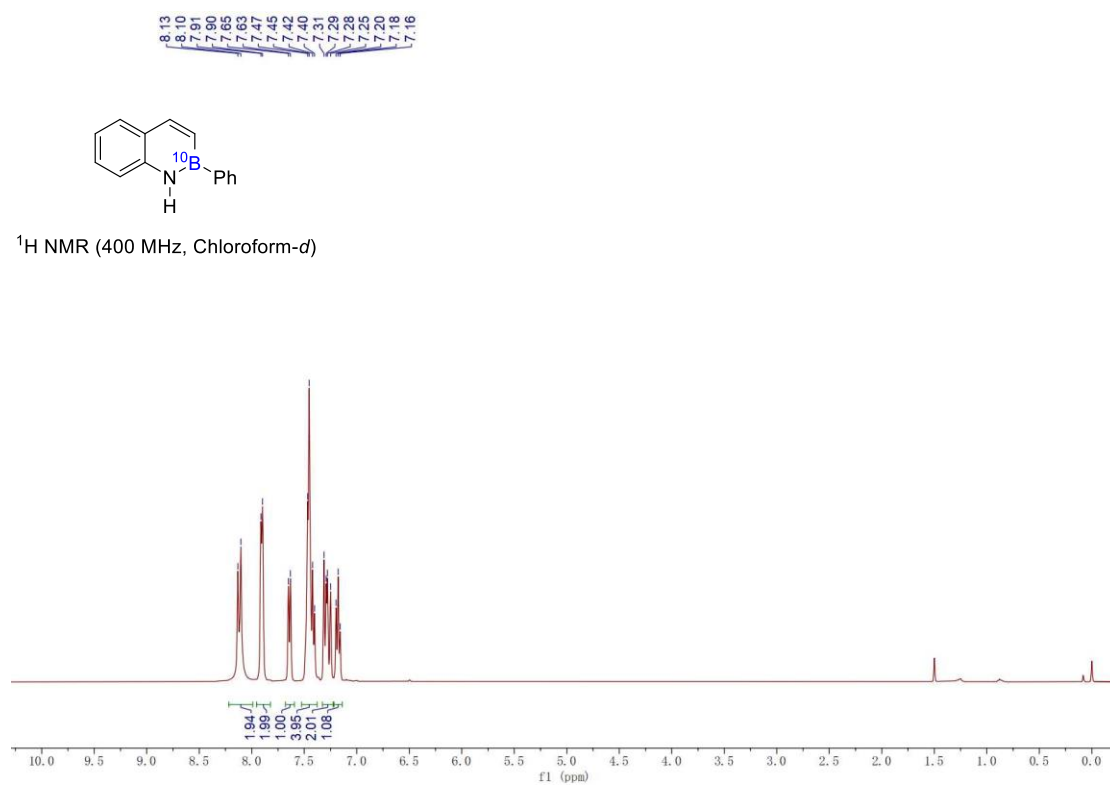

$^1\text{H}$  NMR spectrum of **3p**



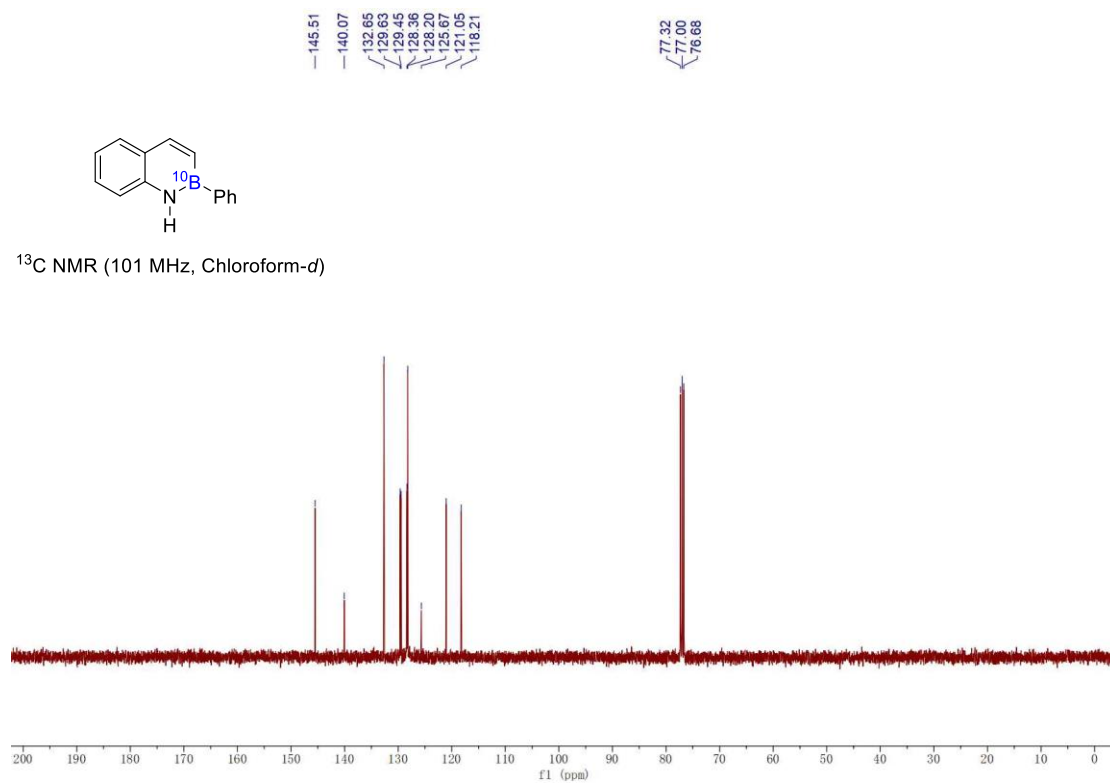

$^{13}\text{C}$  NMR spectrum of **3p**

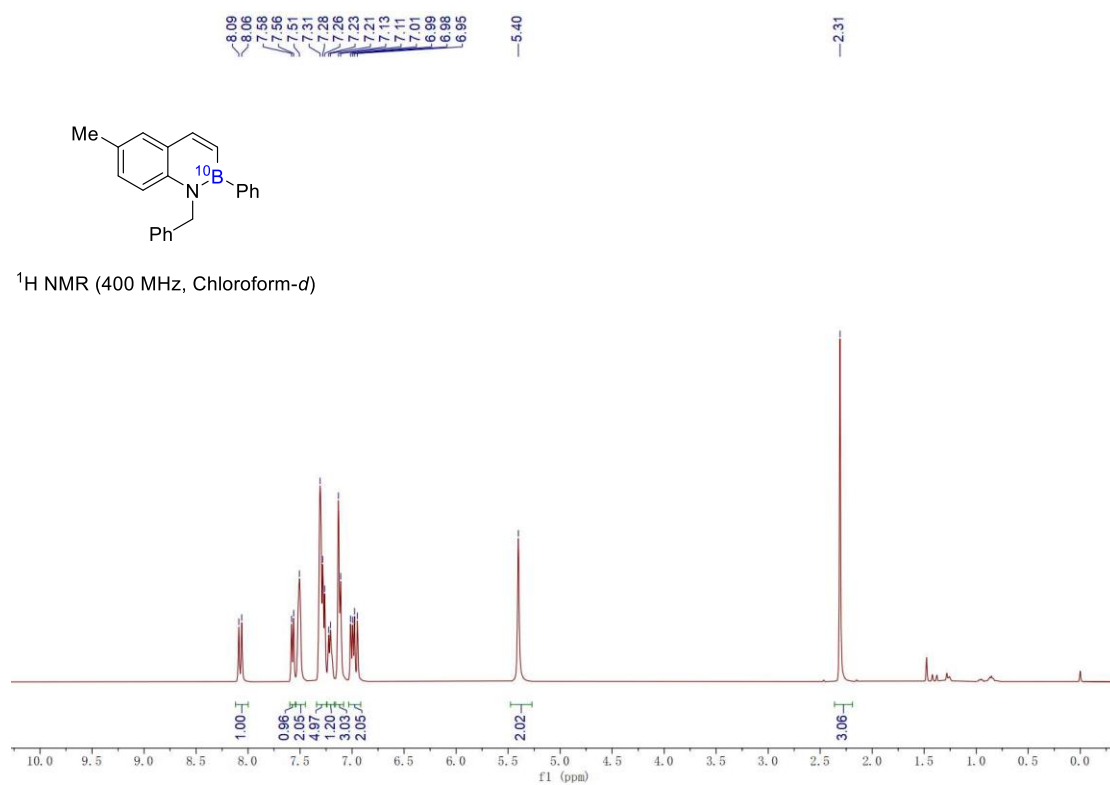

$^1\text{H}$  NMR spectrum of **3q**

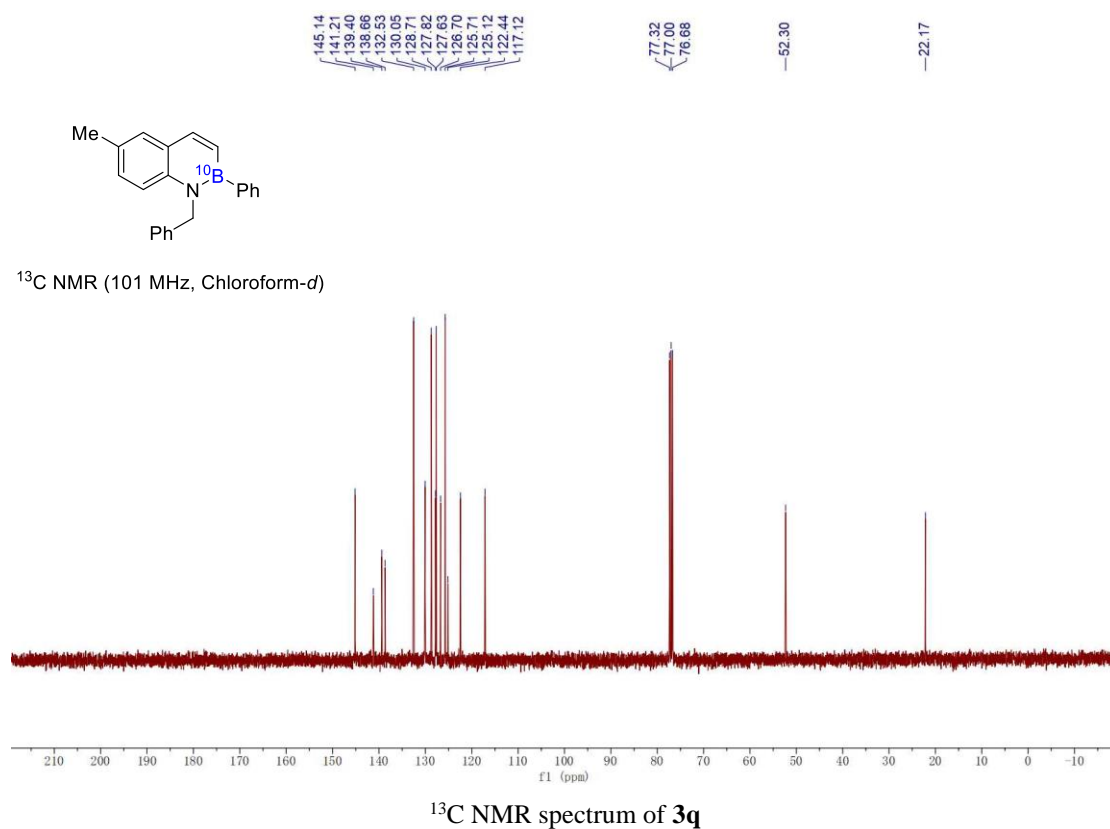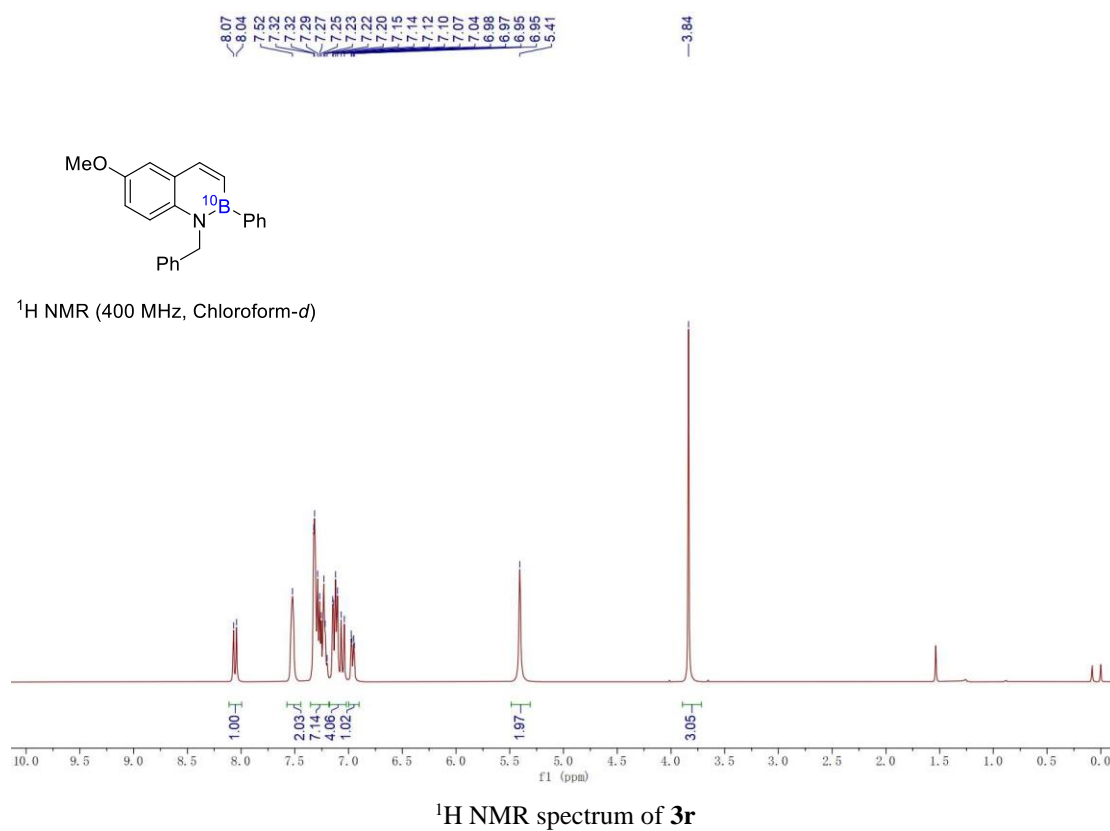

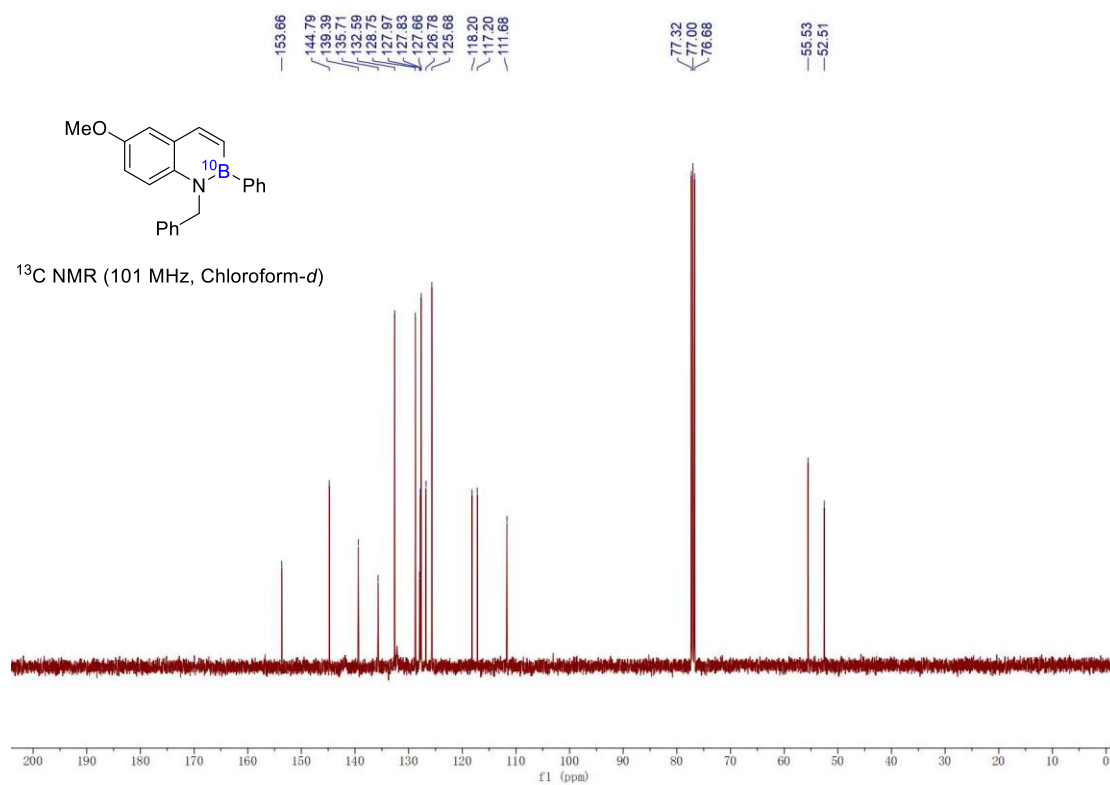

$^{13}\text{C}$  NMR spectrum of **3r**

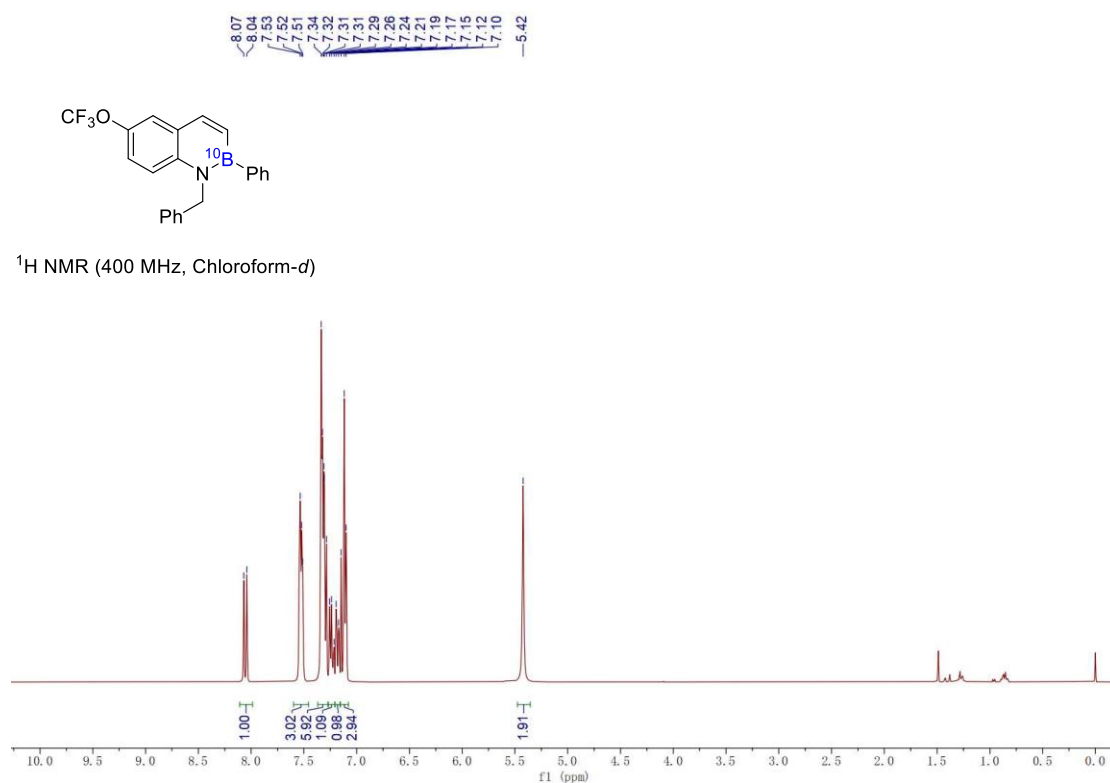

$^1\text{H}$  NMR spectrum of **3s**

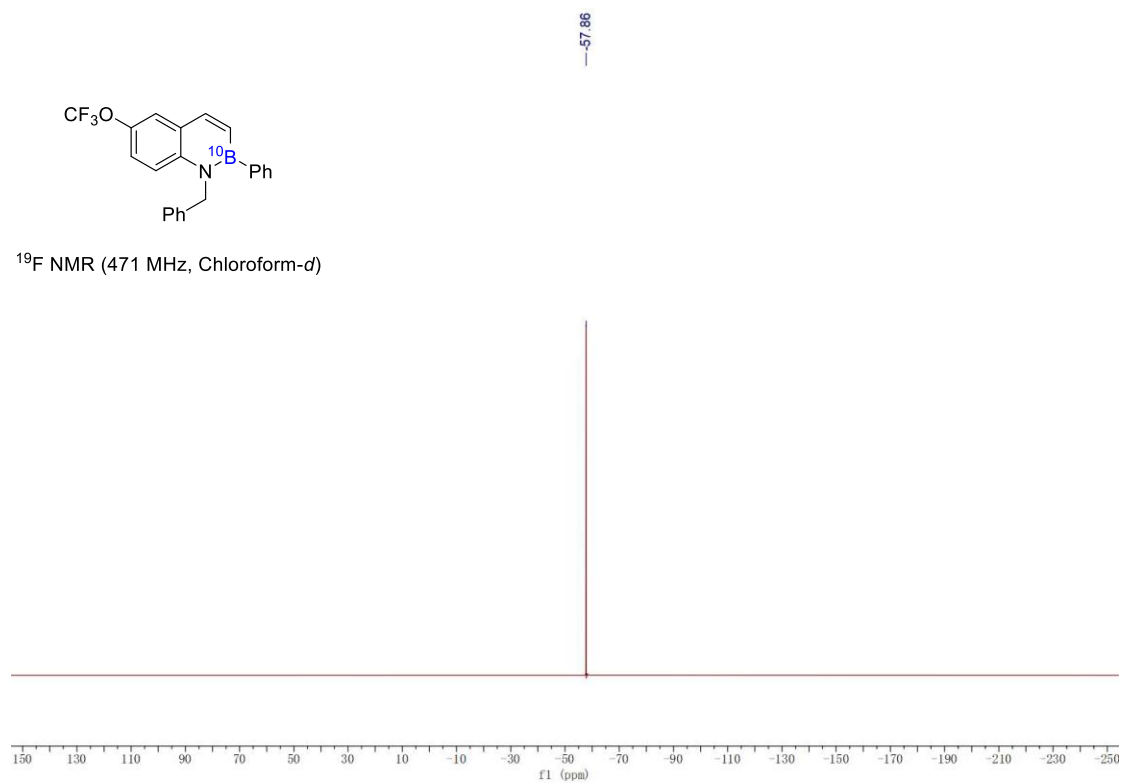

$^{19}\text{F}$  NMR spectrum of **3s**

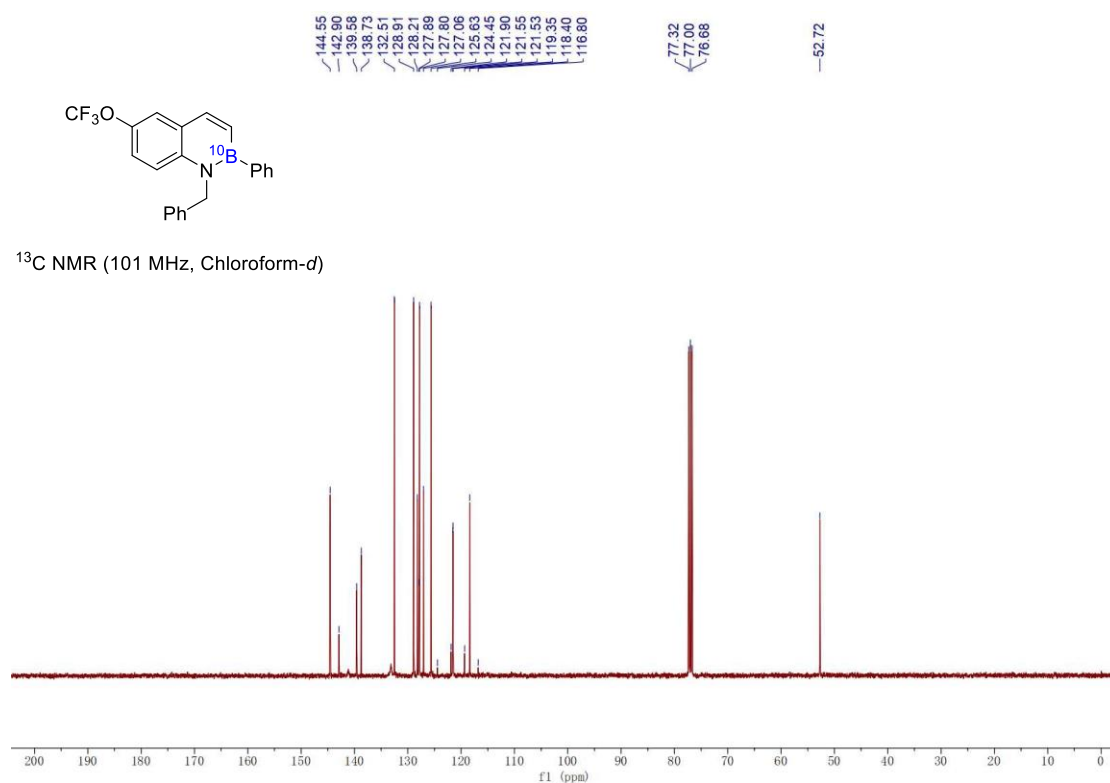

$^{13}\text{C}$  NMR spectrum of **3s**

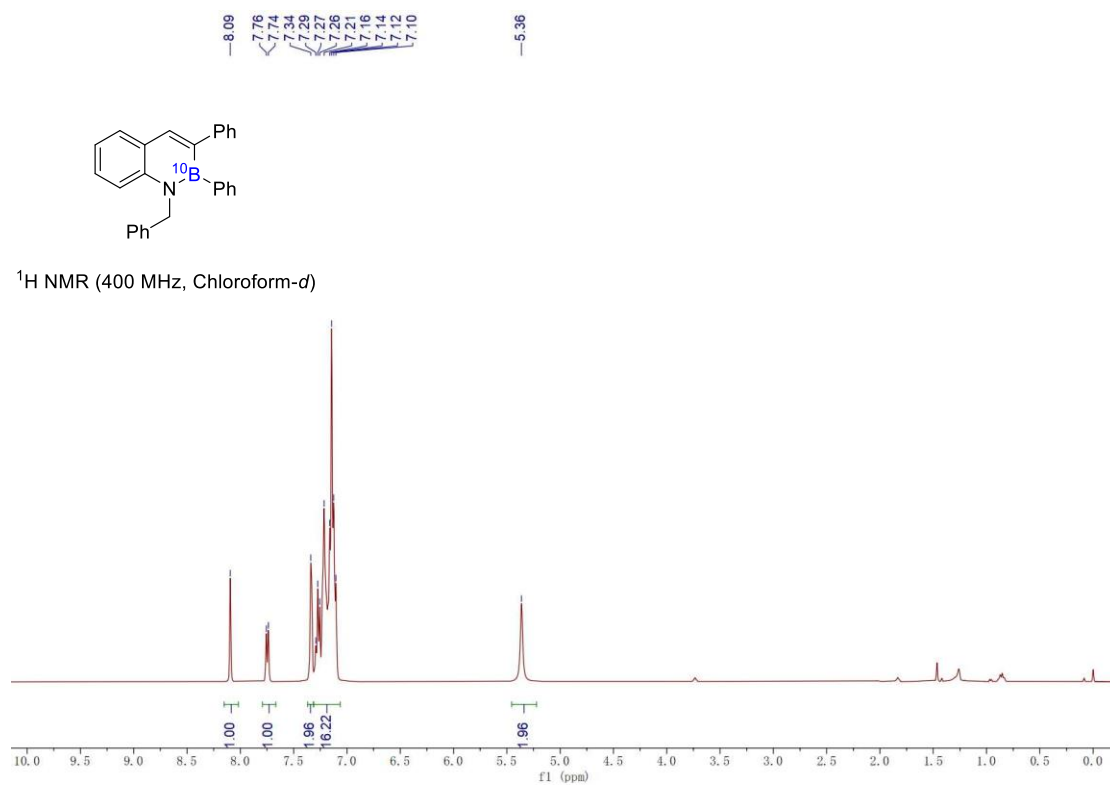

$^1\text{H}$  NMR spectrum of **3t**

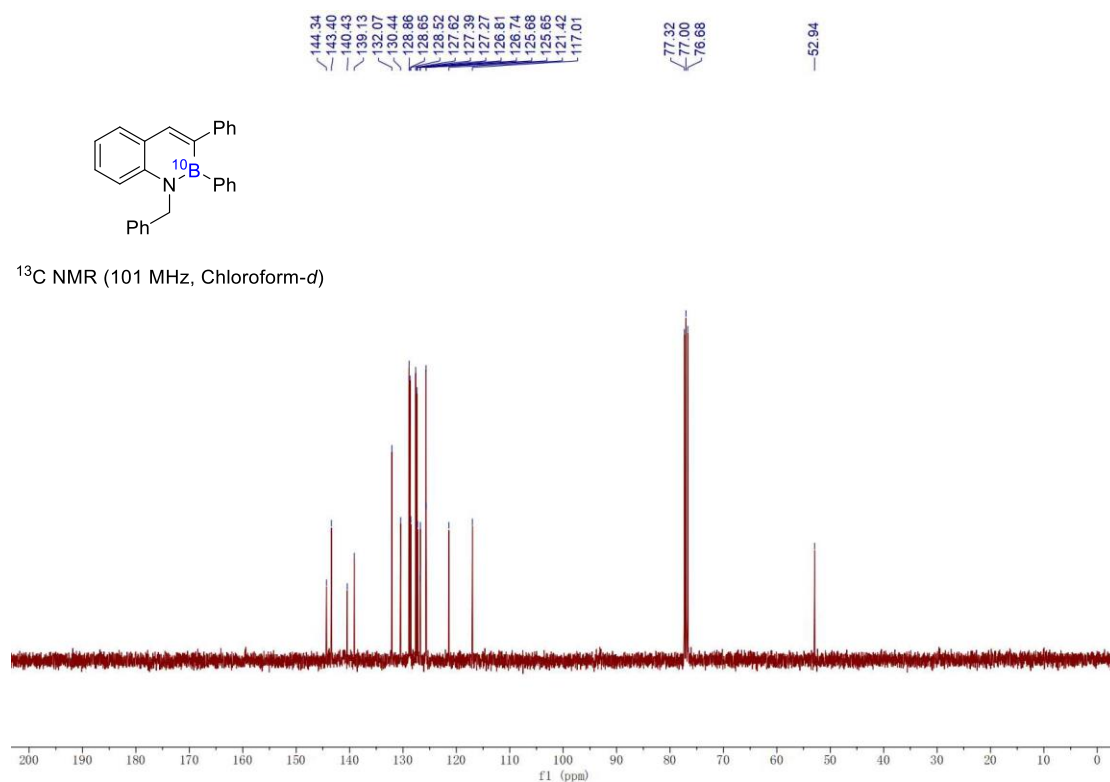

$^{13}\text{C}$  NMR spectrum of **3t**

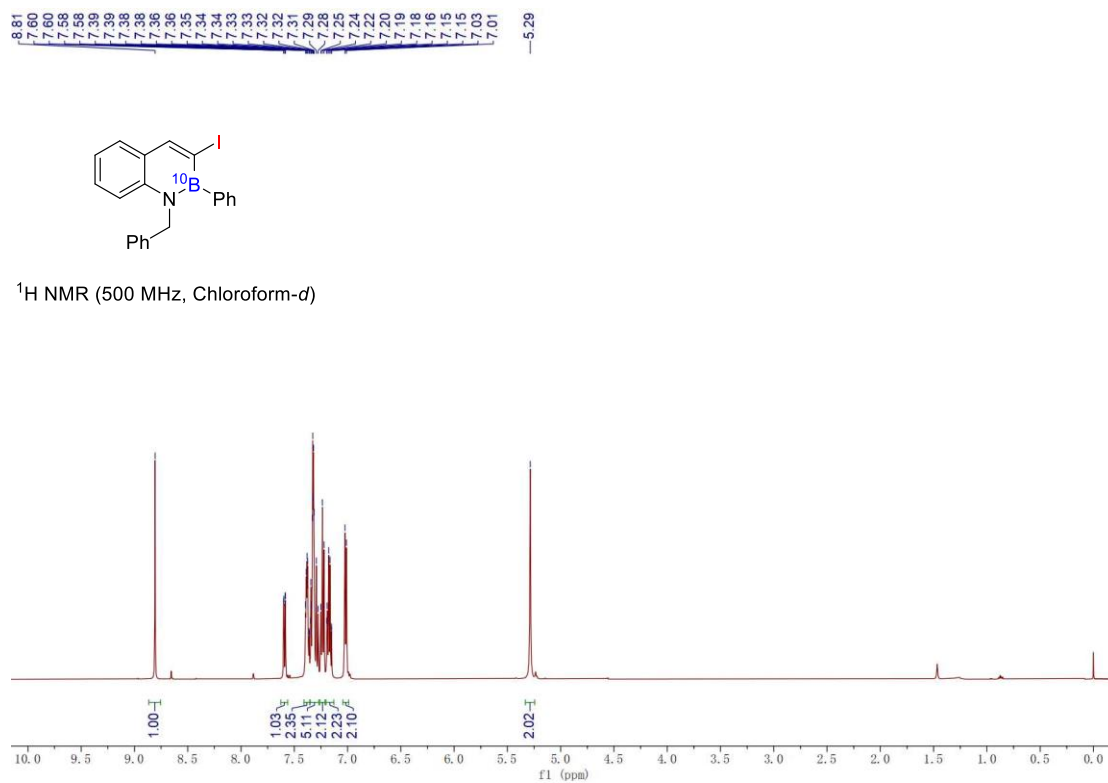

<sup>1</sup>H NMR spectrum of **4**

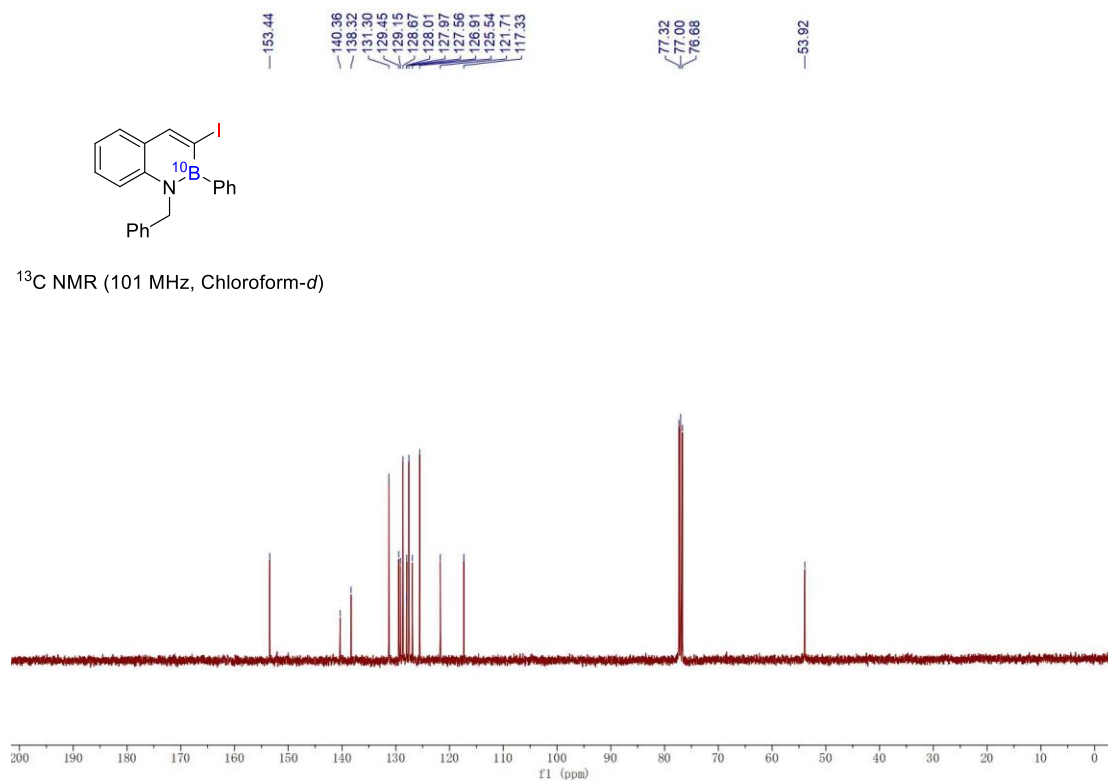

<sup>13</sup>C NMR spectrum of **4**

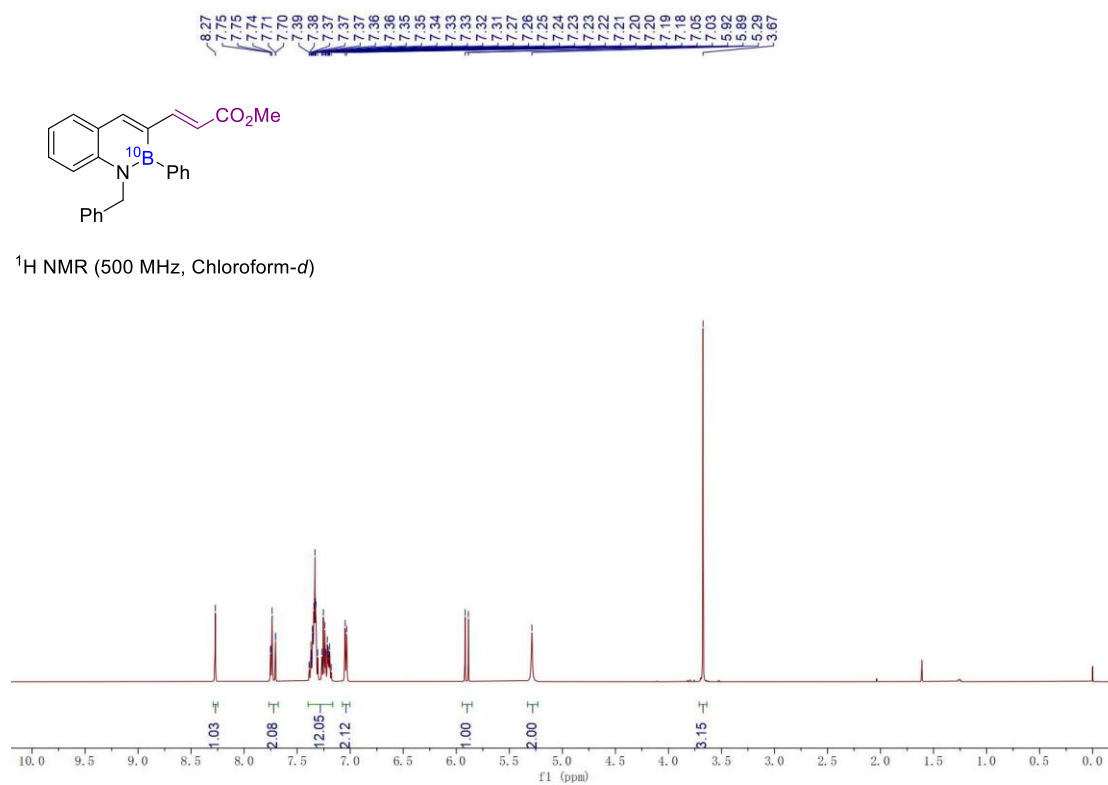

$^1\text{H}$  NMR spectrum of **5**

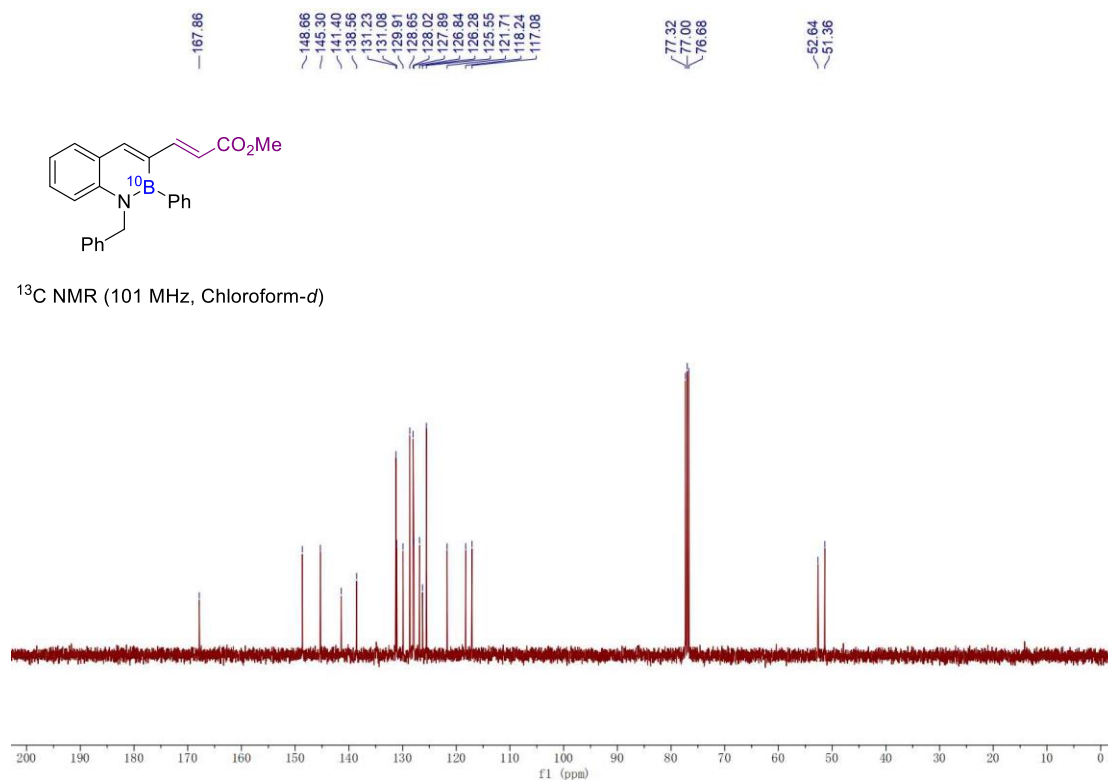

$^{13}\text{C}$  NMR spectrum of **6**

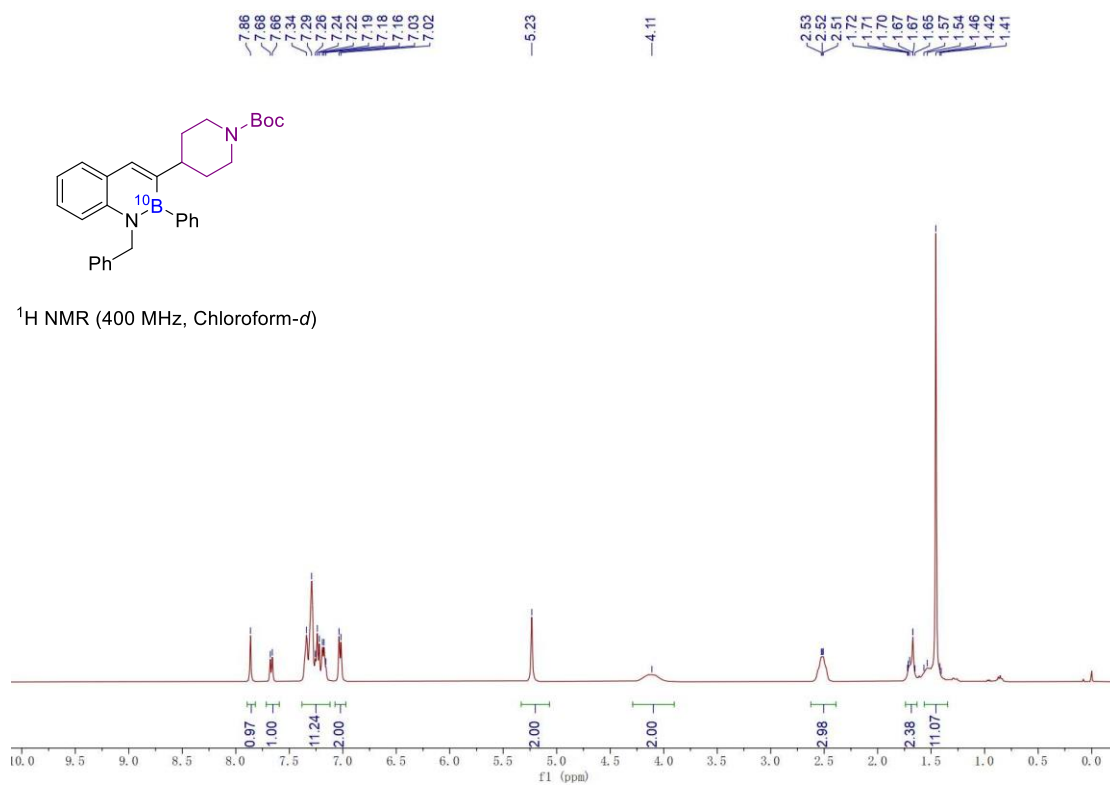

$^1\text{H}$  NMR spectrum of **6**

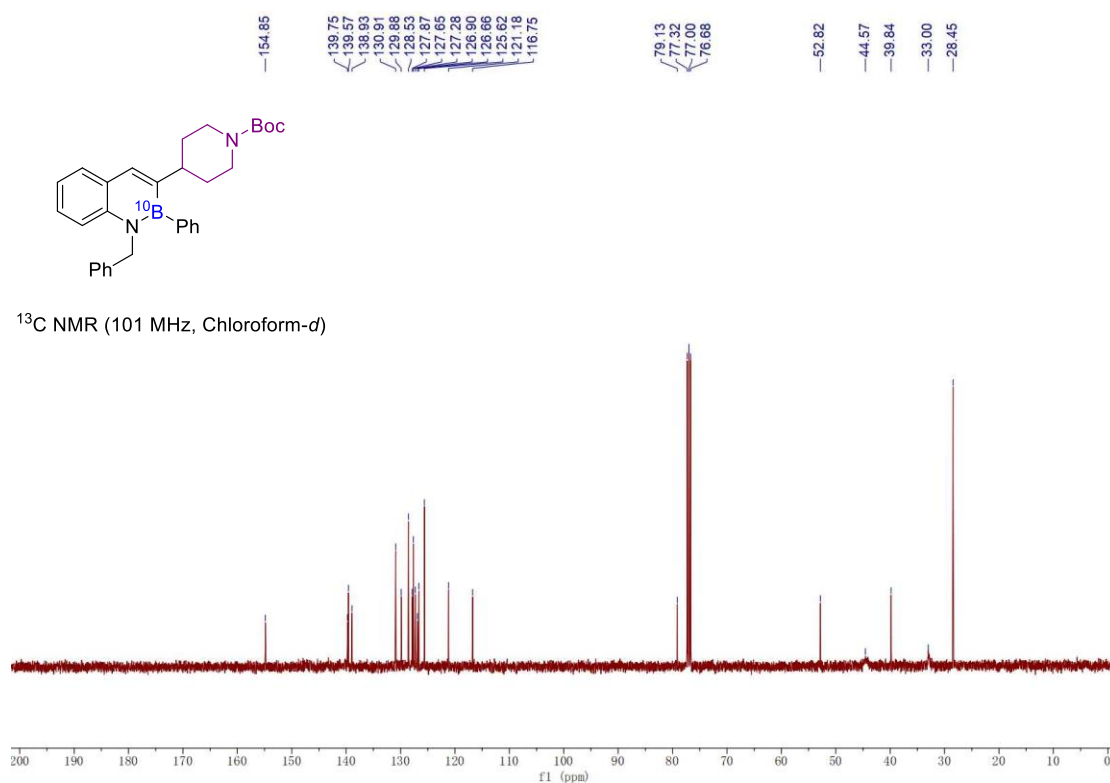

$^{13}\text{C}$  NMR spectrum of **6**



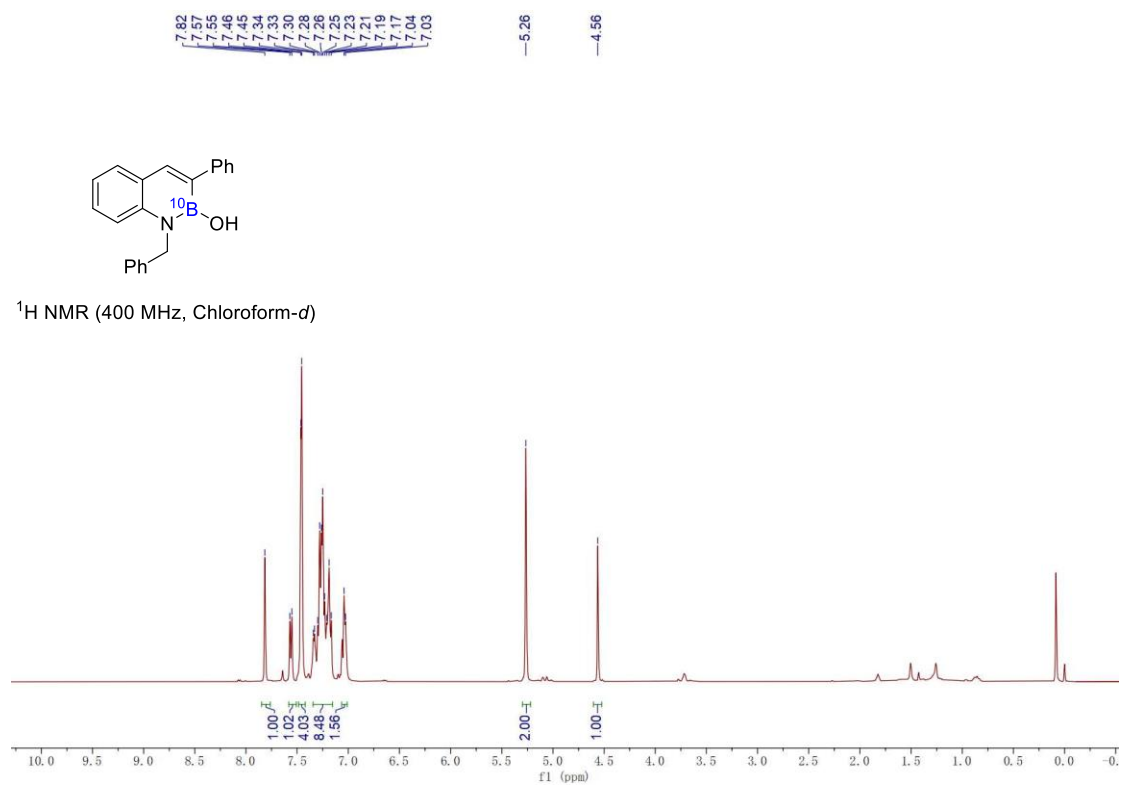

$^1\text{H}$  NMR spectrum of **7**

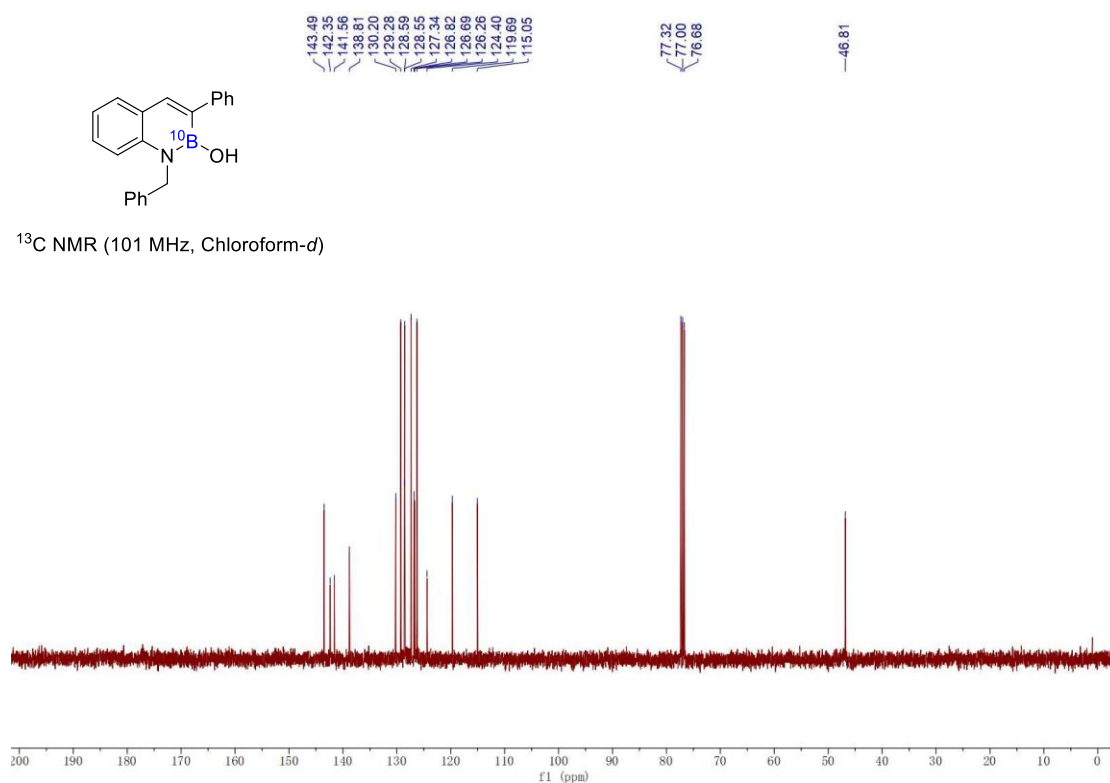

$^{13}\text{C}$  NMR spectrum of **7**
